# Supplementary material for: Efficient access to triarylmethanes through decarboxylation
Source: Royal Society of Chemistry journal article supplement (doi:10.1039/c6ra25429b), 2017-01-01
Supplement: c6ra25429b1.pdf [file c6ra25429b1.pdf]

## Efficient Access to Triarylmethanes through Decarboxylation

Tiash Saha, Srinivas Lavanaya Kumar M, Saurav Bera, Bidhu Bhusan Karkara and Gautam Panda\*

Medicinal and Process Chemistry Division, CSIR-Central Drug Research Institute, B.S. 10/1,  
Jankipuram Extension, Sitapur Road, Lucknow-226031, UP, India.

E-mail: gautam\_panda@cdri.res.in

### Supporting Information

#### EXPERIMENTAL SECTION

**General.** All the reactions were carried out in oven-dried glassware under Argon atmosphere. Carboxylic acids were purchased from Sigma Aldrich. Palladium catalysts were purchased from Sigma Aldrich. Phosphine ligands were bought from Sigma-Aldrich or Alfa Aesar and used as such. DMSO and DMF was dried according to standard procedure and stored on molecular sieves 4 Å. All the other reagents and solvents mentioned in this text were bought from Sigma Aldrich or Alfa Aesar or spectrochem and purified if necessary. NMR spectra were recorded on 300, 400 or 500 MHz spectrometer for <sup>1</sup>H NMR, 75 or 100 or 125 MHz for <sup>13</sup>C NMR spectroscopy. Chemical shifts are reported in parts per million (δ) downfield relative to the residual signals of tetramethylsilane in CDCl<sub>3</sub>. Spin multiplicities are indicated by the following symbol: s (singlet), d (doublet), t (triplet) and m (multiplet).

#### General procedure for synthesis of Diphenyl carbinols

A 100 ml double-necked round bottom flask was charged with magnesium (2 equiv), pinch of iodine and after flushing with nitrogen, dried THF was added and stirred. Then corresponding bromoarene (1.5equiv) was added, the colour of iodine disappeared slowly on time, indicating the generation of Grignard reagent. It was stirred for one hour followed by addition of corresponding carbaldehyde (1 equiv). Completion of reaction was determined by TLC. Reaction was quenched by NH<sub>4</sub>Cl solution. Organic layer was extracted thrice with ethyl acetate and concentrated *in vacuo*. Compound was purified by column chromatography.

#### General procedure for synthesis of Diphenyl methyl iodide

To oven dried round bottom flask under nitrogen, the alcohol (1 equiv) and KI (1 equiv) were added and dissolved in dry 1,4-dioxane and stirred for 5 min. Then BF<sub>3</sub>.Et<sub>2</sub>O (1equiv) was added and

stirred at room temperature. Completion of reaction was monitored by TLC. The reaction mixture was poured in cold water and extracted with dichloromethane. The organic layer was washed with water and dried by sodium sulphate; solvent was evaporated under reduced pressure. The crude was purified by quickly passing through short pad of silica using hexane /ethyl acetate (8:2) as eluent to obtain diphenylmethyl iodides and should be used immediately.

### **General procedure A for synthesis of various substituted triarylmethanes by Decarboxylative**

#### **Cross Coupling**

To the oven dried round bottom flask was charged with aryl carboxylic acid (1equiv),  $\text{Ag}_2\text{CO}_3$  (1.5 equiv),  $\text{PdCl}_2$  (0.1 equiv), Xantphos (0.2 equiv), diphenyl methyl iodides (1 equiv) were dissolved in DMSO. The reaction mixture was degassed with argon thrice and stirred in preheated oil bath. Reaction as monitored by TLC after completion, the reaction mixture was cooled to room temperature and filtered through celite bed. The organic layer was washed with  $\text{NH}_4\text{Cl}$  solution and dried on sodium sulphate and concentrated under reduced pressure. It was later purified by column chromatography on silica gel to obtain corresponding triarylmethanes.

### **General procedure B for synthesis of substituted triarylmethanes by Decarboxylative Cross Coupling**

To the oven dried round bottom flask was charged with aryl carboxylic acid (1equiv),  $\text{Ag}_2\text{CO}_3$  (1.5 equiv),  $\text{PdCl}_2$  (0.2 equiv), Xantphos (0.4 equiv), diphenyl methyl iodides (1 equiv) were dissolved in DMSO:DMF 90:10. The reaction mixture was degassed with argon thrice and stirred in preheated oil bath at requisite temperature and was monitored by TLC. After the completion of reaction, mixture was cooled to room temperature and filtered through a bed celite with ethyl acetate. The organic layer was washed with  $\text{NH}_4\text{Cl}$  solution and dried on sodium sulphate and concentrated *in vacuo*. It was later purified by column chromatography on silica gel to obtain corresponding triarylmethanes.

### **Spectroscopic data of synthesized compounds**

#### **((2,6-dimethoxyphenyl)methylene)dibenzene (3aa)**

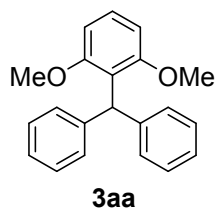

Prepared following the general procedure A. Rf: 0.35 (2% EtOAc in Hex). Isolated as pale brown, oily liquid (yield: 68%).  $^1\text{H}$  NMR (400 MHz,  $\text{CDCl}_3$ ):  $\delta$  7.27-7.06 (m, 10H), 6.73-6.71 (m, 1H), 6.46-6.37 (m, 2H), 5.82 (s,

1H), 3.78 (s, 3H), 3.68 (s, 3H) ppm. <sup>13</sup>C NMR (100 MHz, CDCl<sub>3</sub>): 158.2 (2C), 143.0 (2C), 129.5 (4C), 128.1 (4C), 126.8 (2C), 124.6, 102.5 (2C), 97.4, 54.3, 54.0, 47.9 ppm. IR (film, cm<sup>-1</sup>): 2817, 1726, 1582, 1231, 814, 770, 637. MS (ESI): m/z 305 (M+H)<sup>+</sup>. HRMS (ESI): m/z calcd for C<sub>21</sub>H<sub>21</sub>O<sub>2</sub> [M+H]<sup>+</sup> 305.1536, found 305.1542.

### 1,3-dimethoxy-2-(phenyl(o-tolyl)methyl)benzene (3ab)

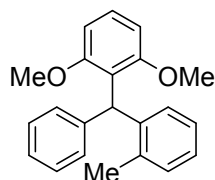

**3 ab**

Prepared following the general procedure A. Rf: 0.4 (2% EtOAc in Hex). Isolated as yellow oily liquid (yield: 70%). <sup>1</sup>H NMR (400 MHz, CDCl<sub>3</sub>): δ 7.22-7.02 (m, 8H), 6.79-6.35 (m, 4H), 5.89 (s, 1H), 3.78 (s, 3H), 3.68 (s, 3H), 2.18 (s, 3H) ppm. <sup>13</sup>C NMR (100 MHz, CDCl<sub>3</sub>): 159.3, 158.0, 143.6, 142.6, 136.7, 130.6, 130.1, 129.5 (2C), 128.9, 128.0 (2C), 126.0, 125.8, 125.4, 124.7, 103.7, 98.6, 55.6, 55.2, 45.9, 19.6 ppm. IR (film, cm<sup>-1</sup>): 2828, 1631, 1536, 1483, 1284, 1171, 823, 772, 656. MS (ESI): m/z 319 (M+H)<sup>+</sup>. HRMS (ESI): m/z calcd for C<sub>22</sub>H<sub>23</sub>O<sub>2</sub> [M+H]<sup>+</sup> 319.1693, found 319.1691.

### 1-methoxy-2-(phenyl(p-tolyl)methyl)benzene (3bf)

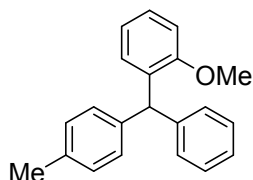

**3bf**

Prepared following the general procedure A. Rf: 0.6 (1.5% EtOAc in Hex). Yield: 72%. <sup>1</sup>H NMR (400 MHz, CDCl<sub>3</sub>): δ 7.23-6.80 (m, 11H), 6.43-6.34 (m, 2H), 5.69 (s, 1H), 3.70 (s, 3H), 2.27 (s, 3H) ppm. <sup>13</sup>C NMR (100 MHz, CDCl<sub>3</sub>): 156.2, 144.4, 141.1, 141.0, 135.1, 135.0, 132.7, 132.6, 129.1, 129.0, 129.0, 128.6, 127.8, 125.6, 125.5, 124.1, 103.7, 98.6, 55.8, 48.6, 21.0 ppm. IR (film, cm<sup>-1</sup>): 1689, 1276, 948, 879, 847, 716. MS (ESI): m/z 289 (M+H)<sup>+</sup>. HRMS (ESI): m/z calcd for C<sub>21</sub>H<sub>21</sub>O [M+H]<sup>+</sup> 289.1587, found 289.1594.

### 1,3-dimethoxy-2-(phenyl(4-propylphenyl)methyl)benzene (3ac)

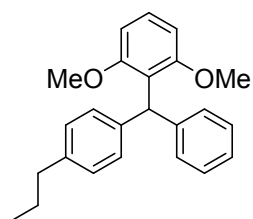

**3 ac**

Prepared following the general procedure A. Rf: 0.3 (2% EtOAc in Hex). Yield: 80%, <sup>1</sup>H NMR (400 MHz, CDCl<sub>3</sub>): δ 7.25-6.96 (m, 9H), 6.75-6.73 (m, 1H), 6.45-6.37 (m, 2H), 5.79 (s, 1H), 3.77 (s, 3H), 3.68 (s, 3H), 2.54 (t, 2H, J=7.83Hz), 1.64-1.59 (m, 2H), 0.92 (t, 3H, J=7.32Hz) ppm. <sup>13</sup>C NMR (100 MHz, CDCl<sub>3</sub>): 159.3, 157.9, 144.5, 141.3, 140.1, 130.7, 129.3 (2C), 129.1 (2C), 128.1 (2C), 128.0 (2C), 125.8, 125.5, 103.7, 98.6, 55.5, 55.2, 48.6, 37.6, 24.4, 13.9 ppm. IR (film, cm<sup>-1</sup>): 3248, 1692, 1452, 1268, 910, 880, 730, 633. MS (ESI): m/z 347 (M+H)<sup>+</sup>. HRMS (ESI): m/z calcd for C<sub>24</sub>H<sub>27</sub>O<sub>2</sub> (M+H)<sup>+</sup> 347.2006, found 347.2003.

**1,3-dimethoxy-2-((4-methoxyphenyl)(phenyl)methyl)benzene (3 ad):**

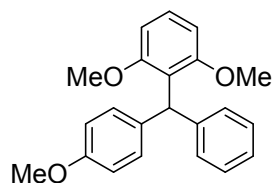

**3ad**

Prepared following the general procedure A. Rf: 0.2 (3% EtOAc in Hex). Yield: 74%, <sup>1</sup>H NMR (400 MHz, CDCl<sub>3</sub>): δ 7.35-6.36 (m, 12H), 5.76 (s, 1H), 3.76 (s, 3H), 3.76 (s, 3H), 3.67 (s, 3H) ppm. <sup>13</sup>C NMR (100 MHz, CDCl<sub>3</sub>): 159.3, 158.9, 157.9, 144.6, 136.3, 130.6, 130.3, 129.3, 128.5, 128.3, 128.0, 127.1, 127.0, 125.8, 125.5, 113.4, 103.7, 98.6, 55.6, 55.2, 55.2, 48.3 ppm. IR (film, cm<sup>-1</sup>): 2802, 1664, 1596, 1327, 932, 815, 804, 730, 623. MS (ESI): m/z 335 (M+H)<sup>+</sup>. HRMS (ESI): m/z calcd for C<sub>22</sub>H<sub>23</sub>O<sub>3</sub> (M+H)<sup>+</sup> 335.1642, found 335.1632.

**1,3-dimethoxy-2-((4-methoxyphenyl)(o-tolyl)methyl)benzene (3 ae)**

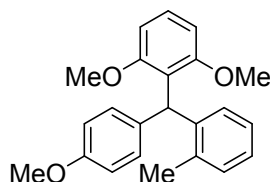

**3ae**

Prepared following the general procedure A. Rf: 0.3 (4% EtOAc in Hex). Yield: 72%, <sup>1</sup>H NMR (400 MHz, CDCl<sub>3</sub>): δ 7.17-6.28 (m, 11H), 5.76 (s, 1H), 3.70 (s, 6H), 3.60 (s, 3H), 2.10 (s, 3H) ppm. <sup>13</sup>C NMR (100 MHz, CDCl<sub>3</sub>): 159.3, 157.9, 157.7, 143.0, 136.6, 135.6, 130.5, 130.3, 130.1 (2C), 128.7 (2C), 125.9, 125.4, 125.0, 113.4, 103.7, 98.6, 55.6, 55.2, 55.1, 45.1, 19.5 ppm. IR (film, cm<sup>-1</sup>): 2902, 1685, 1536, 1347, 911, 776. MS (ESI): m/z 349 (M+H)<sup>+</sup>. HRMS (ESI): m/z calcd for C<sub>23</sub>H<sub>25</sub>O<sub>3</sub> (M+H)<sup>+</sup> 349.1798, found 349.1810.

**1-((4-ethoxyphenyl)(phenyl)methyl)-2-methoxybenzene (3bg):**

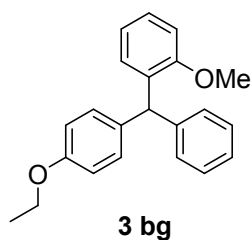

Prepared following the general procedure A. Rf: 0.3 (2 % EtOAc in Hex). Yield: 68%, <sup>1</sup>H NMR (400 MHz, CDCl<sub>3</sub>): δ 7.08-6.29 (m, 13H), 5.62 (s, 1H), 3.90 (m, 2H), 3.62 (s, 3H), 1.31 (t, 3H, J=5.4 Hz) ppm. <sup>13</sup>C NMR (100 MHz, CDCl<sub>3</sub>): 157.0, 156.2, 144.6, 136.2, 136.1, 132.6, 132.5, 130.0 (2C), 129.1 (3C), 127.9 (2C), 125.6, 124.3, 113.9, 95.5, 63.3, 55.8, 48.2, 14.9 ppm. IR (film, cm<sup>-1</sup>): 2815, 1664, 1592, 1585, 1320, 1104, 932, 812, 730, 623. MS (ESI): m/z 319 (M+H)<sup>+</sup>. HRMS (ESI): m/z calcd for C<sub>22</sub>H<sub>23</sub>O<sub>2</sub> [M+H]<sup>+</sup> 319.1693, found 319.1693.

**2-((3,4-dimethoxyphenyl)(phenyl)methyl)-1,3-dimethoxybenzene (3ah):**

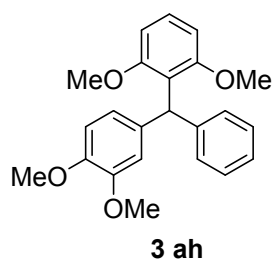

Prepared following the general procedure A. Rf: 0.3 (5% EtOAc in Hex). Yield: 79%, <sup>1</sup>H NMR (400 MHz, CDCl<sub>3</sub>): δ 7.18-6.29 (m, 11H), 5.68 (s, 1H), 3.76 (s, 3H), 3.70 (s, 3H), 3.67 (s, 3H), 3.61 (s, 3H) ppm. <sup>13</sup>C NMR (100 MHz, CDCl<sub>3</sub>): 158.2, 156.8, 147.4, 146.0, 143.3, 135.6, 129.4 (2C), 128.1 (2C), 126.8, 124.7, 124.2, 120.1, 111.7, 109.5, 102.6, 97.5, 54.6, 54.6, 54.4, 54.1, 47.5 ppm. IR (film, cm<sup>-1</sup>): 2805, 1664, 1587, 1523, 1320, 1104, 897, 816. MS (ESI): m/z 365 (M+H)<sup>+</sup>, HRMS (ESI): m/z calcd for C<sub>23</sub>H<sub>25</sub>O<sub>3</sub> [M+H]<sup>+</sup> 365.1747, found 365.1756.

**((2-methoxyphenyl)methylene)dibenzene (3ba):**

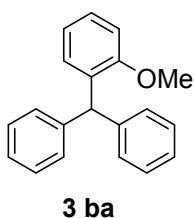

Prepared following the general procedure A. Rf: 0.5 (1% EtOAc in Hex). Yield: 71%, <sup>1</sup>H NMR (400 MHz, CDCl<sub>3</sub>): δ 7.27-6.79 (m, 14H), 5.48 (s, 1H), 3.75 (s, 3H) ppm. <sup>13</sup>C NMR (100 MHz, CDCl<sub>3</sub>): 158.0, 144.3 (2C), 136.1, 130.4 (2C), 129.4 (5C), 128.3 (4C), 126.2 9(2C), 113.7, 56.0, 55.2 ppm. IR (film, cm<sup>-1</sup>): 2943, 1685,

1576, 1280, 810, 730. MS (ESI):  $m/z$  275 (M+H)<sup>+</sup>. HRMS (ESI):  $m/z$  calcd for C<sub>20</sub>H<sub>19</sub>O [M+H]<sup>+</sup> 275.1430, found 275.1439.

**Triphenylmethane (3ca):**

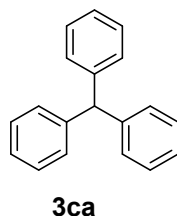

Prepared following the general procedure A. Rf: 0.5 (1% EtOAc in Hex). Yield: 67 %, <sup>1</sup>H NMR (400 MHz, CDCl<sub>3</sub>):  $\delta$  7.33-7.09 (m, 15H), 5.54 (s, 1H) ppm. <sup>13</sup>C NMR (100 MHz, CDCl<sub>3</sub>): 143.9 (3C), 129.5, 128.3 (6C), 128.3 (6C), 128.2, 126.3, 56.9 ppm. IR (film, cm<sup>-1</sup>): 2987, 1642, 1586, 1572, 1121. MS (ESI):  $m/z$  245 (M+H)<sup>+</sup>. HRMS (ESI):  $m/z$  calcd for C<sub>19</sub>H<sub>17</sub>O [M+H]<sup>+</sup> 245.1325, found 245.1329.

**1-((4-chlorophenyl)(phenyl)methyl)-2-methoxybenzene (3bi):**

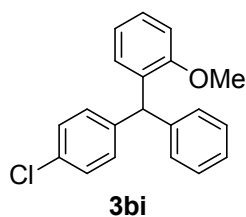

Prepared following the general procedure A. Rf: 0.3 (2% EtOAc in Hex). Yield: 62%. <sup>1</sup>H NMR (400 MHz, CDCl<sub>3</sub>):  $\delta$  7.25-7.19 (m, 6H), 7.07-6.99 (m, 4H), 6.87- 6.79 (m, 3H), 5.87 (s, 1H), 3.69 (s, 3H) ppm. <sup>13</sup>C NMR (100 MHz, CDCl<sub>3</sub>): 157.0, 143.3, 142.5, 132.1, 131.8, 130.7, 130.2, 129.4 (2C), 128.2 (5C), 127.8, 126.2, 120.3, 110.7, 55.5, 49.0 ppm. IR (film, cm<sup>-1</sup>): 2763, 1675, 1297, 981, 824, 747, 615. MS (ESI):  $m/z$  309 (M+H)<sup>+</sup>. HRMS (ESI):  $m/z$  calcd for C<sub>20</sub>H<sub>18</sub>ClO [M+H]<sup>+</sup> 309.1041, found 309.1050.

**((4-(trifluoromethyl)phenyl)methylene)dibenzene (3cj):**

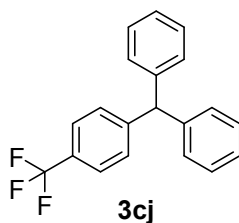

Prepared following the general procedure A. Rf: 0.5 (1 % EtOAc in Hex). Yield: 56%. <sup>1</sup>H NMR (400 MHz, CDCl<sub>3</sub>):  $\delta$  7.54-7.52 (m, 2H), 7.31-7.21 (m, 8H), 7.10-7.08 (m, 4H), 5.59 (s, 1H) ppm. <sup>13</sup>C NMR (100 MHz, CDCl<sub>3</sub>): 148.0, 142.9 (2C), 129.7, 129.3 (6C), 128.5 (6C), 126.6, 125.2, 125.2, 56.6. IR (film, cm<sup>-1</sup>): 2812,

1664, 1543, 1320, 932, 815. MS (ESI):  $m/z$  313 (M+H)<sup>+</sup>. HRMS (ESI):  $m/z$  calcd for C<sub>20</sub>H<sub>16</sub>F<sub>3</sub> [M+H]<sup>+</sup> 313.1199, found 313.1198.

**4-((2-fluoro-5-nitrophenyl)(phenyl)methyl)-1,1'-biphenyl (3dk):**

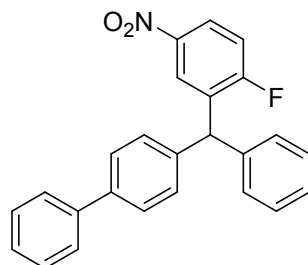

**3dk**

Prepared following the general procedure B. Rf: 0.5 (3% EtOAc in Hex). Yield: 42%, <sup>1</sup>H NMR (400 MHz, CDCl<sub>3</sub>): δ 7.58-7.54 (m, 4H), 7.45-7.32 (m, 6H), 7.29-7.25 (m, 7H), 5.48 (s, 1H) ppm. <sup>13</sup>C NMR (100 MHz, CDCl<sub>3</sub>): 145.2, 142.1, 140.8, 140.0, 137.8, 132.3, 130.7, 130.0, 128.9, 128.7, 128.4, 128.3 (4C), 128.1(2C), 127.6 (2C), 127.3, 127.2, 127.1, 127.0, 126.9, 79.8. IR (film, cm<sup>-1</sup>): 2883, 1904, 1684, 1892, 1543, 871, 810, 742, 613. MS (ESI):  $m/z$  384 (M+H)<sup>+</sup>. HRMS (ESI):  $m/z$  calcd for C<sub>25</sub>H<sub>19</sub>FNO<sub>2</sub> [M+H]<sup>+</sup> 384.1394, found 384.1402.

**2-((4-methoxyphenyl)(o-tolyl)methyl)-1,3-dimethylbenzene (3ef):**

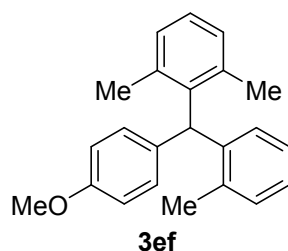

**3ef**

Prepared following the general procedure A. Rf: 0.5 (2% EtOAc in Hex). Yield: 74%. <sup>1</sup>H NMR (400 MHz, CDCl<sub>3</sub>): δ 7.42-7.40 (m, 1H), 7.31-7.12 (m, 10H), 5.40 (s, 1H), 3.38 (s, 3H), 2.26 (s, 9H) ppm. <sup>13</sup>C NMR (100 MHz, CDCl<sub>3</sub>): 144.6, 141.8, 141.4, 141.0, 139.9, 139.6, 136.4, 136.0, 130.6, 130.5, 128.3, 128.2, 127.9, 127.6, 127.4, 126.2, 126.1 (2C), 57.1, 47.4, 19.5 (2C), 19.3 ppm. IR (film, cm<sup>-1</sup>): 2984, 1683, 1317, 981, 823, 728, 604. HRMS (ESI):  $m/z$  calcd for C<sub>23</sub>H<sub>25</sub>O [M+H]<sup>+</sup> 317.1900, found 317.1898.

**4-((2-nitrophenyl)(phenyl)methyl)-1,1'-biphenyl (3fk):**

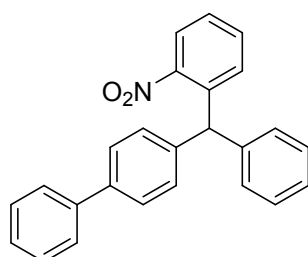

**3fk**

Prepared following the general procedure A. Rf : 0.4 (2 % EtOAc in Hex). Yield: 49 %, <sup>1</sup>H NMR (400 MHz, CDCl<sub>3</sub>): δ 7.58-7.54 (m, 5H), 7.46-7.40 (m, 7H), 7.36-7.28 (m, 6H), 5.48 (s, 1H) ppm. IR (film, cm<sup>-1</sup>): 2873, 1796, 1676, 1579, 1544, 923, 815, 794, 745, 631. HRMS (ESI): m/z calcd for C<sub>25</sub>H<sub>20</sub>NO<sub>2</sub> [M+H]<sup>+</sup> 366.1489, found 366.1499.

**1-((4-methoxyphenyl)(3-(trifluoromethyl)phenyl)methyl)-3-nitrobenzene (3gl):**

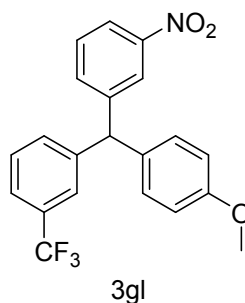

Prepared following the general procedure B. Rf: 0.4 (3% EtOAc in Hex). Yield: 51%. <sup>1</sup>H NMR (400 MHz, CDCl<sub>3</sub>): δ 7.85-7.79 (m, 1H), 7.56-7.51 (m, 2H), 7.42-7.36 (m, 3H), 7.09-7.06 (m, 2H), 7.01-7.00 (m, 2H), 6.85-6.82 (m, 2H), 5.85 (s, 1H), 3.80 (s, 3H) ppm. IR (film, cm<sup>-1</sup>): 2907, 1886, 1673, 1584, 1543, 1281, 942, 881, 634. HRMS (ESI): m/z calcd for C<sub>21</sub>H<sub>17</sub>F<sub>3</sub>NO<sub>3</sub> [M+H]<sup>+</sup> 388.1155, found 388.1149.

**1-chloro-3-((4-methoxyphenyl)(3-(trifluoromethyl)phenyl)methyl)benzene (3hl):**

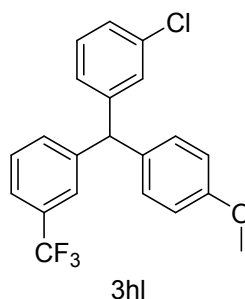

Prepared following the general procedure B. Rf: 0.2 (2% EtOAc in Hex). Yield: 56%. <sup>1</sup>H NMR (400 MHz, CDCl<sub>3</sub>): δ 7.24-7.22 (m, 1H), 7.04-6.98 (m, 2H), 6.95-6.93 (m, 3H), 6.89-6.88 (m, 2H), 6.85-6.84 (m, 1H), 6.82-6.79 (m, 2H), 6.63-6.62 (m, 1H), 5.82 (s, 1H), 3.78 (s, 3H) ppm. IR (film, cm<sup>-1</sup>): 2928, 1691, 1564, 1298, 911, 828, 804. HRMS (ESI): m/z calcd for C<sub>21</sub>H<sub>17</sub>ClF<sub>3</sub>O [M+H]<sup>+</sup> 377.0915, found 377.0919.

**2-benzhydrylthiophene (5):**

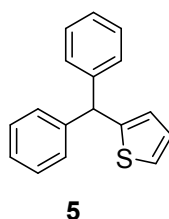

Prepared following the general procedure A. Rf: 0.6 (1% EtOAc in Hex). Yield: 50%. <sup>1</sup>H NMR (400 MHz, CDCl<sub>3</sub>): δ 7.30-7.17 (m, 11H), 6.92 (m, 1H), 6.68 (m, 1H), 5.67 (s, 1H) ppm. <sup>13</sup>C NMR (100 MHz, CDCl<sub>3</sub>): 147.9, 143.8 (2C), 128.8 (4C), 128.4 (4C), 126.7, 126.6, 126.4 (2C), 124.5, 52.1. IR (film, cm<sup>-1</sup>): 1592, 1585,



1365, 623. MS (ESI):  $m/z$  251 (M+H)<sup>+</sup>. HRMS (ESI):  $m/z$  calcd for C<sub>17</sub>H<sub>15</sub>S [M+H]<sup>+</sup> 251.0889, found 251.0892.

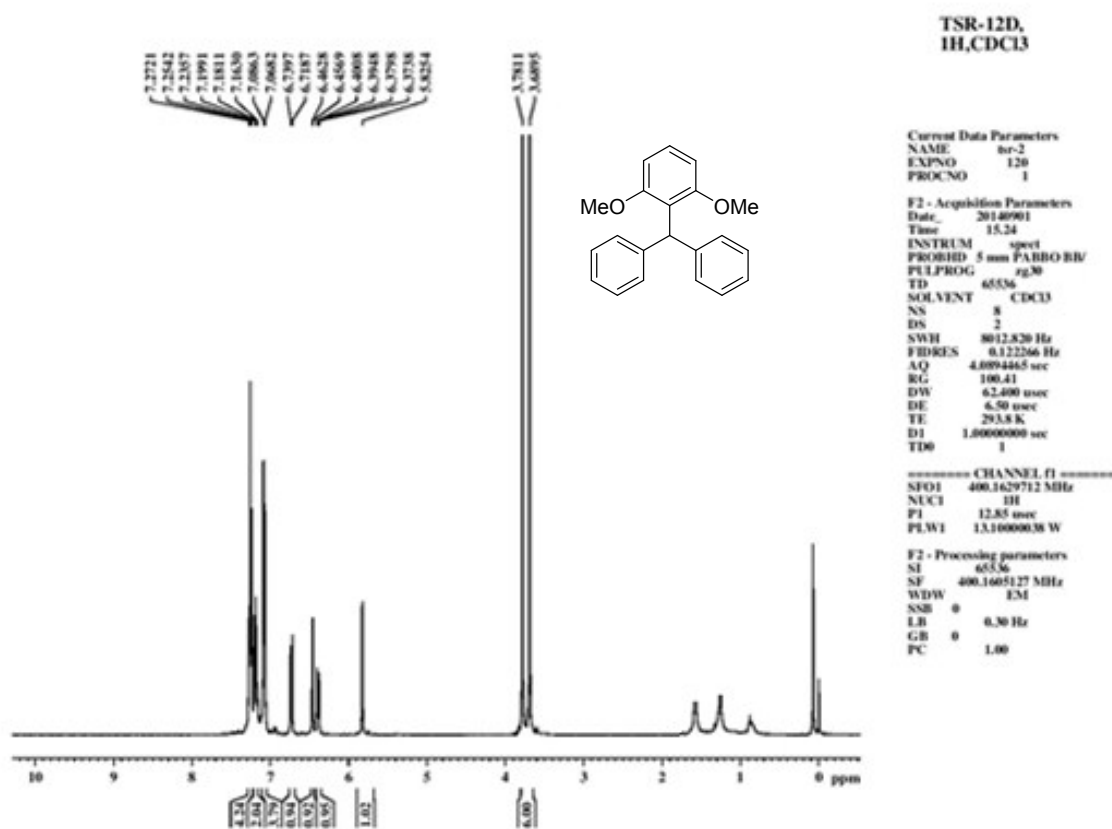

Figure 1. <sup>1</sup>H spectrum of compound 3aa.

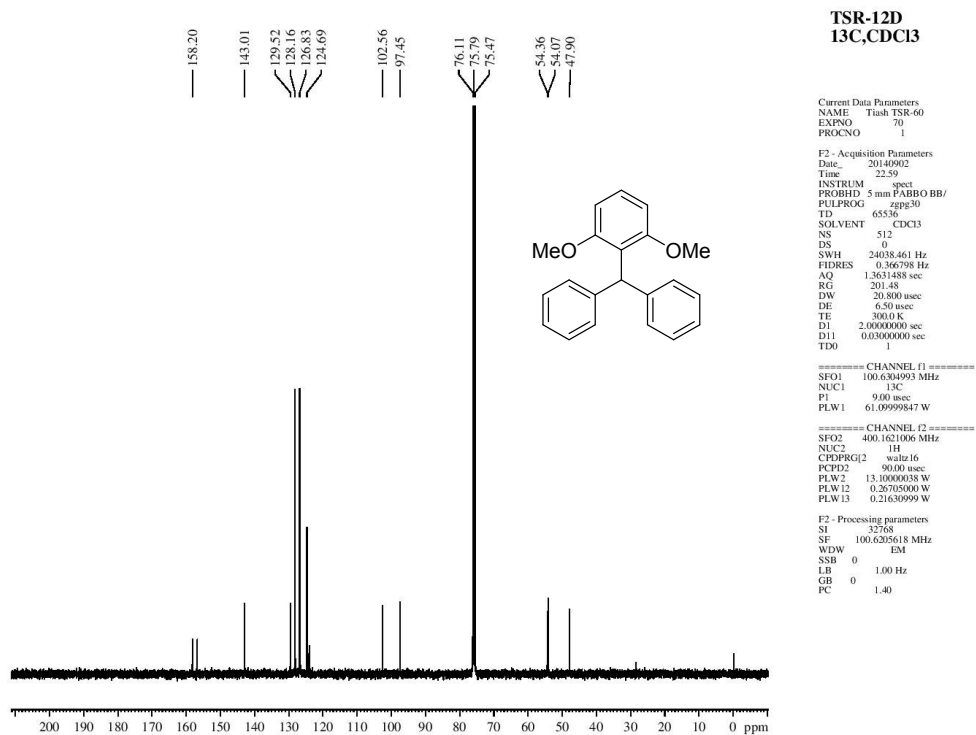

Figure 2. <sup>13</sup>C spectrum of compound 3aa.

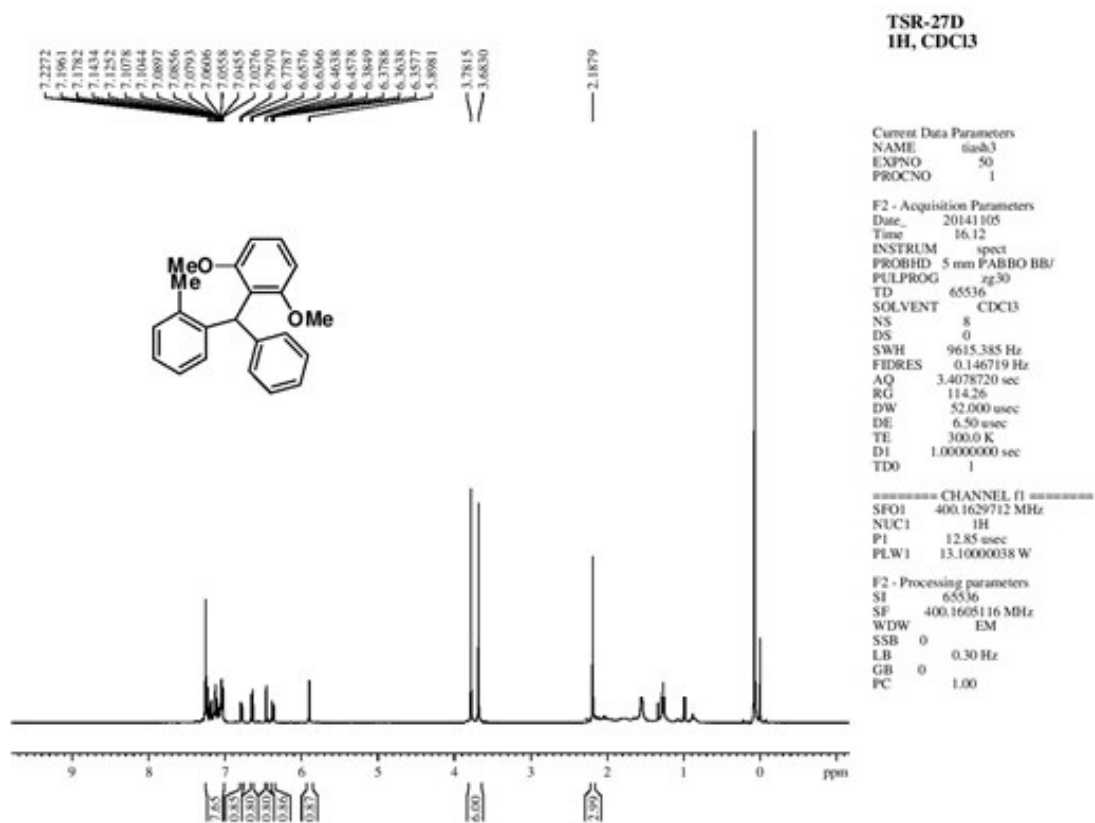

Figure 3. <sup>1</sup>H spectrum of compound **3ab**

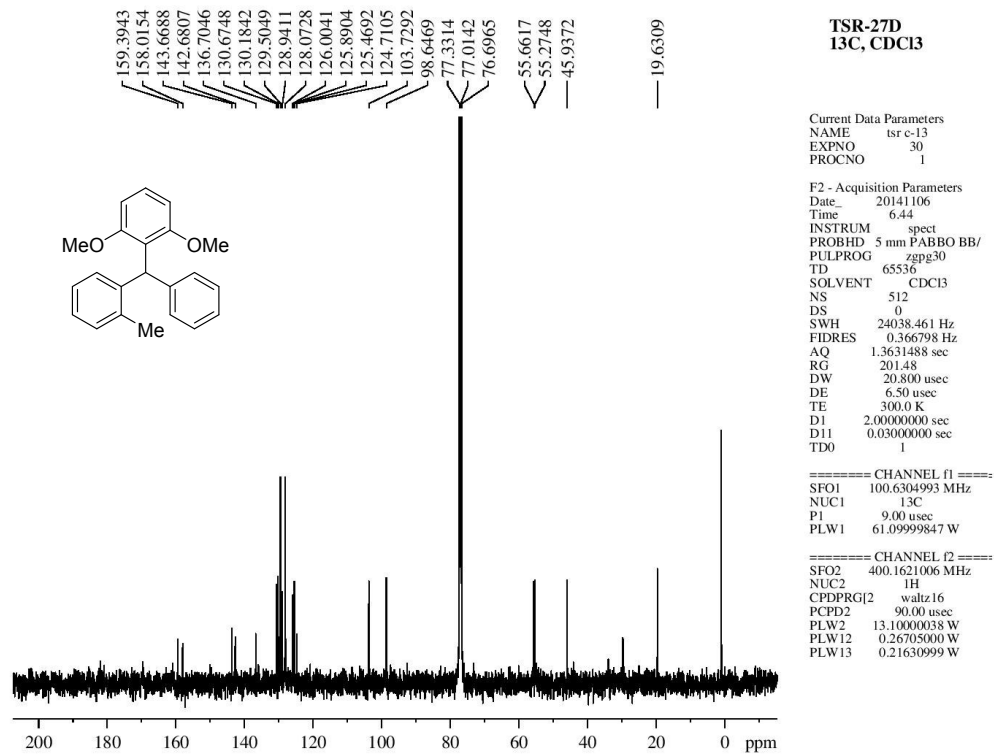

**Figure 4.**  $^{13}\text{C}$  spectrum of compound **3ab**.

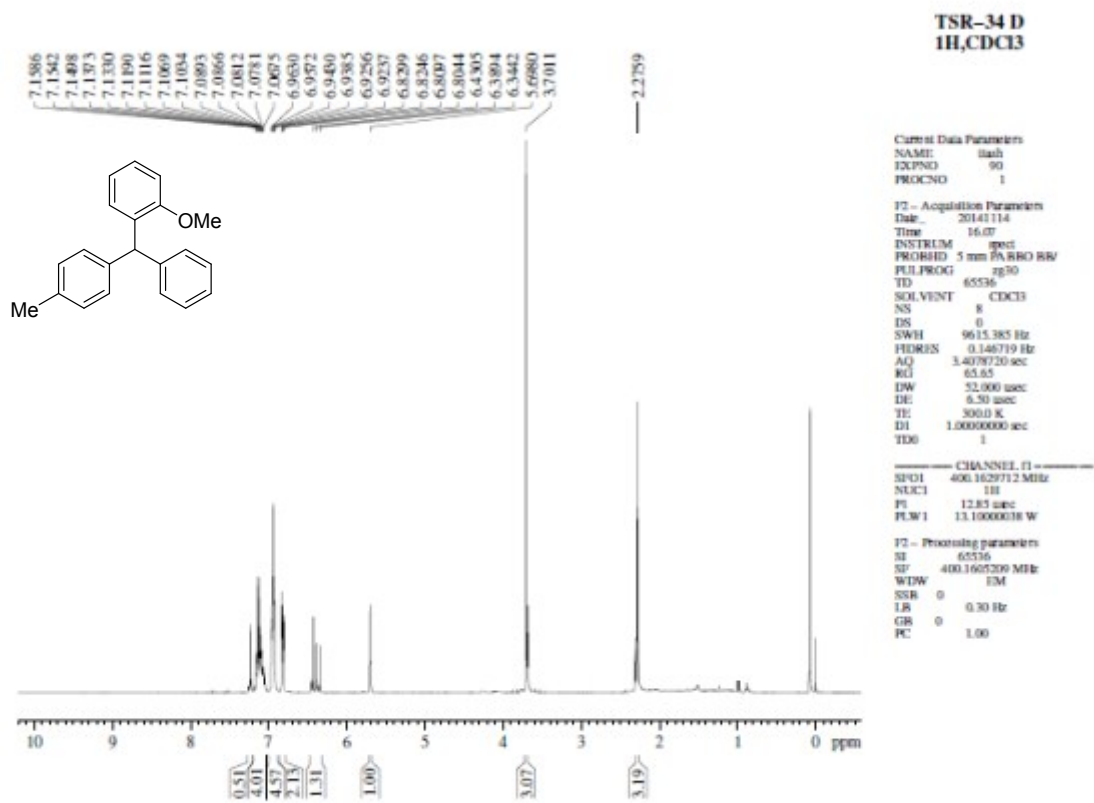

**Figure 5.** <sup>1</sup>H spectrum of compound **3bf**.

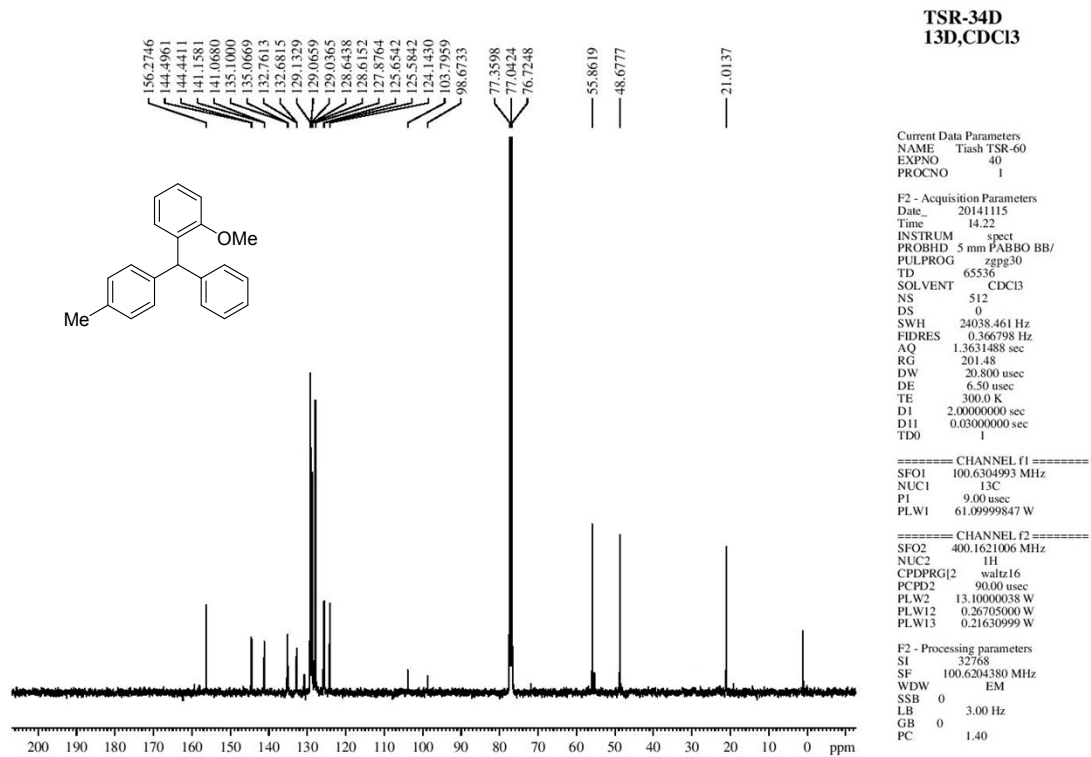

**Figure 6.**  $^{13}\text{C}$  spectrum of compound **3bf**

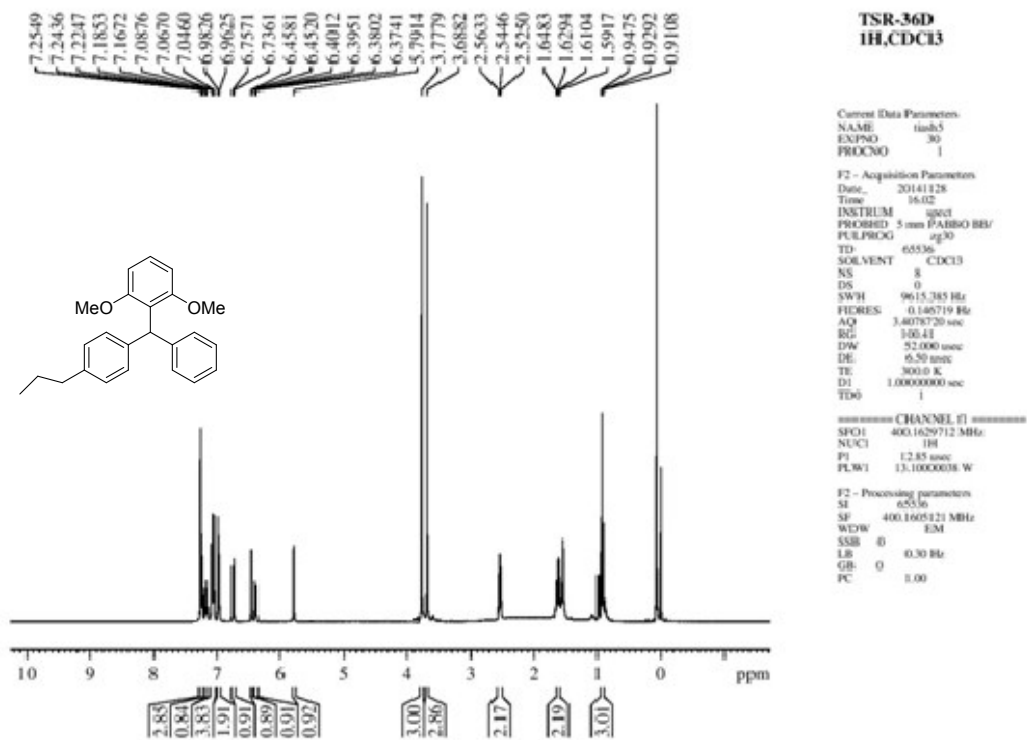

Figure 7. <sup>1</sup>H spectrum of compound 3ac

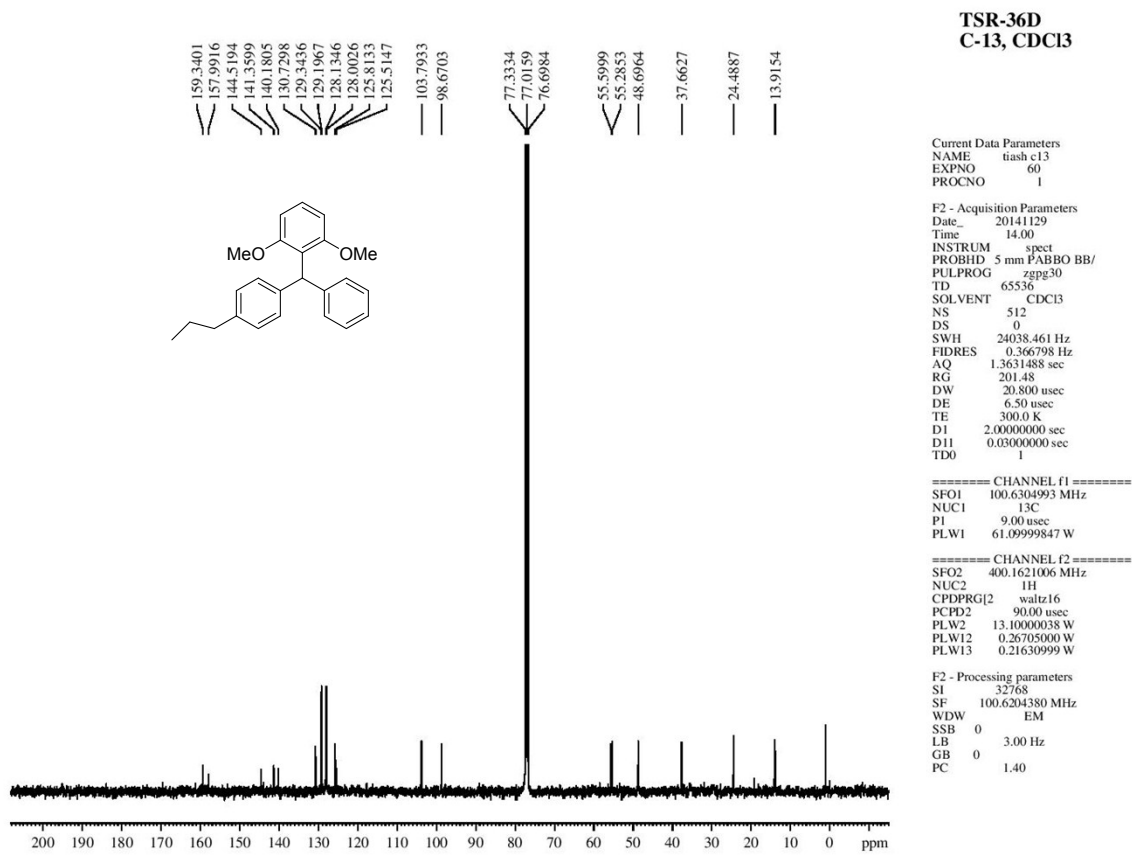

**Figure 8:**  $^{13}\text{C}$  spectrum of compound **3ac**



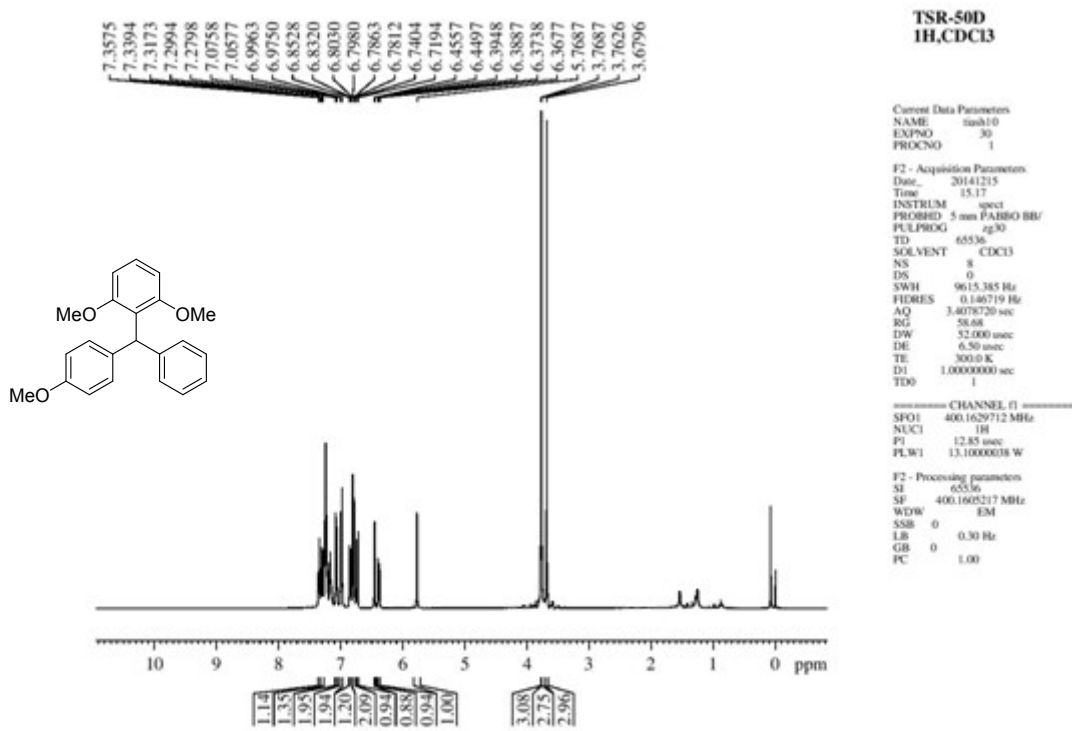

Figure 9. <sup>1</sup>H spectrum of compound 3ad

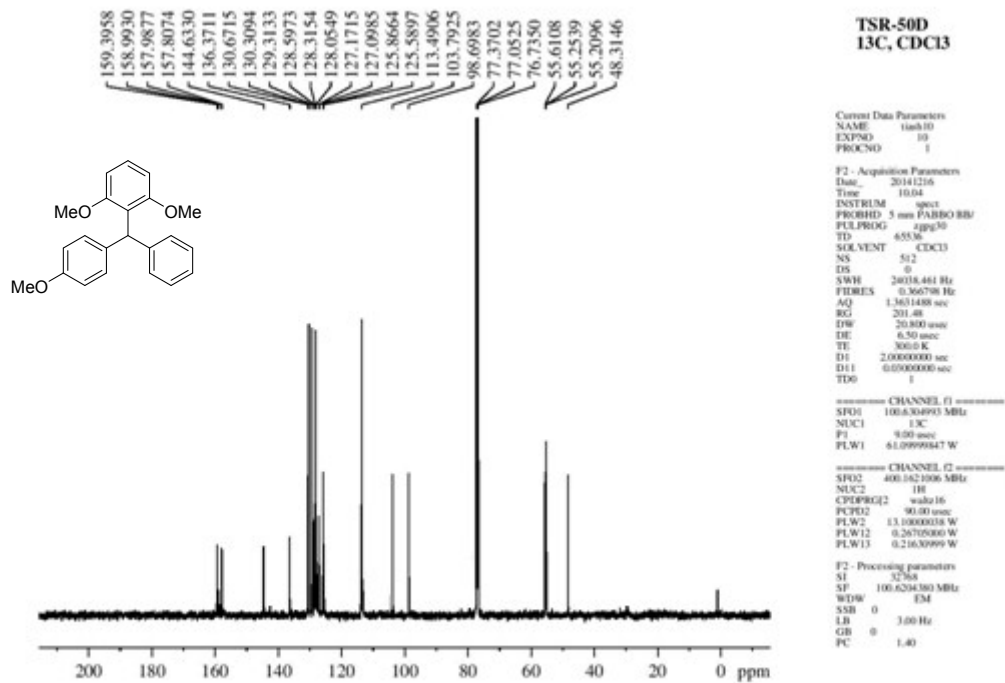

Figure 10. <sup>13</sup>C spectrum of compound 3ad



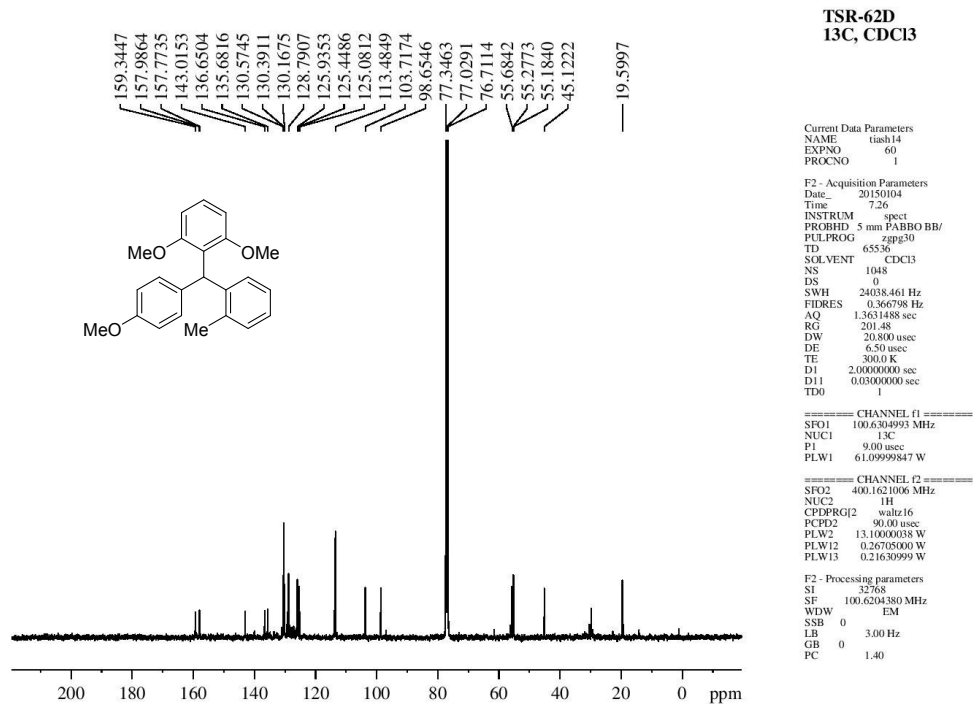

**Figure 12.**  $^{13}\text{C}$  spectrum of compound 3ae

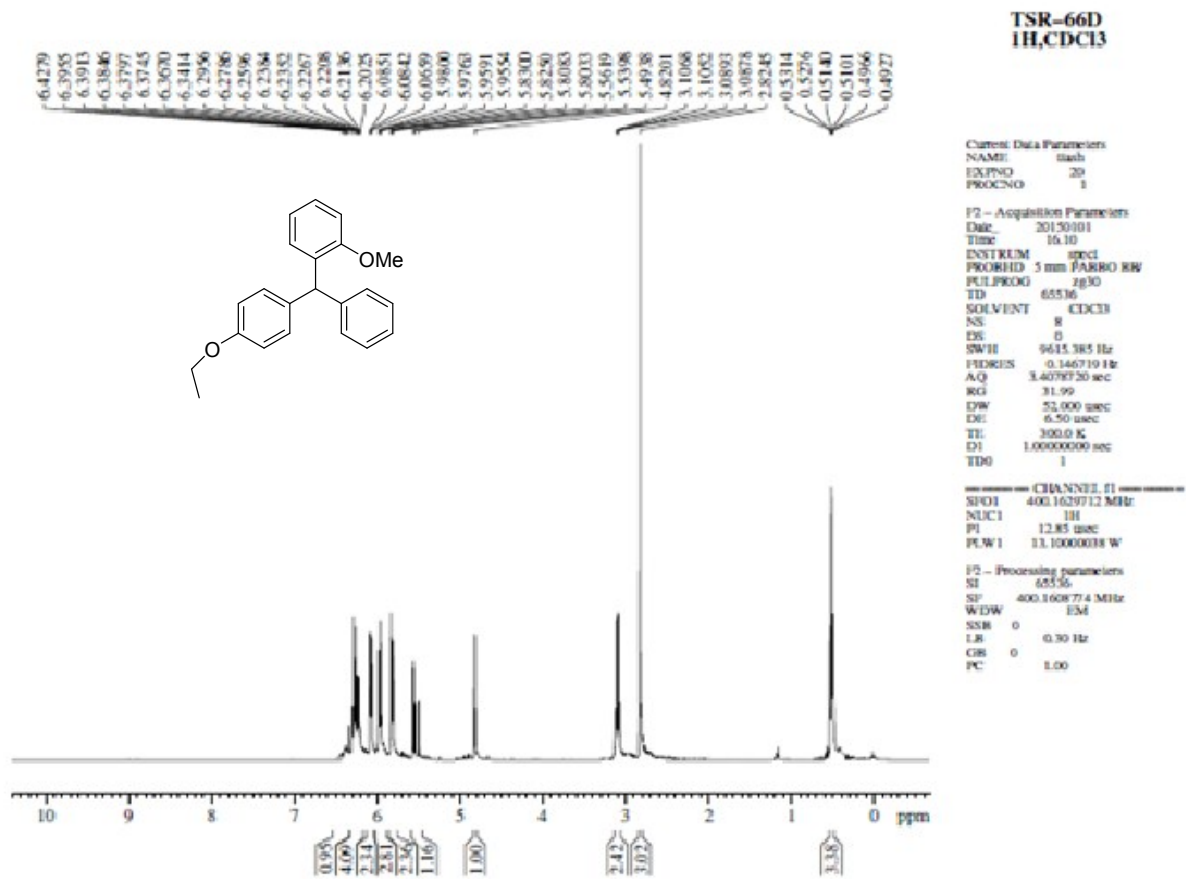

**Figure 13.** <sup>1</sup>H spectrum of compound **3bg**

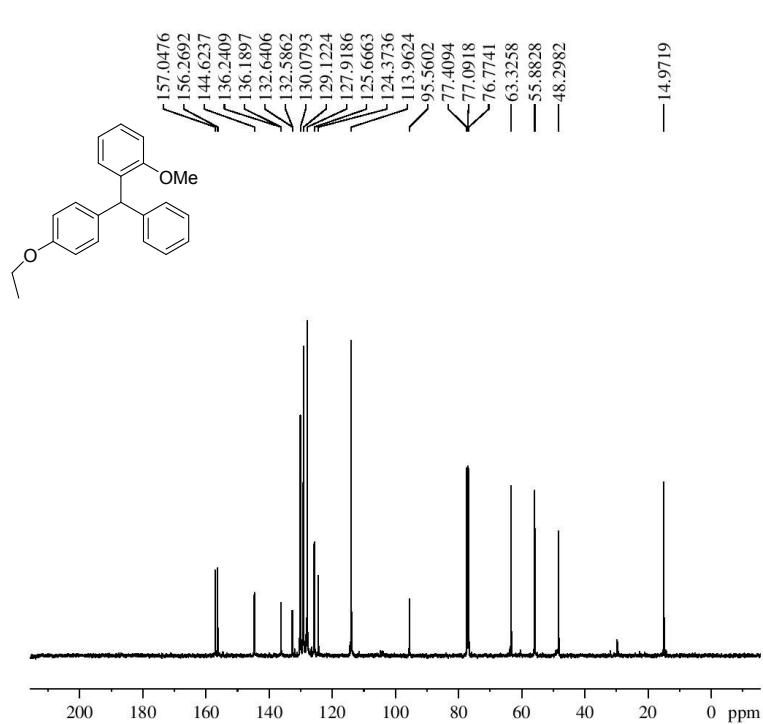

**TSR-66D  
13C,CDCl3**

Current Data Parameters  
NAME tiash14  
EXPNO 10  
PROCNO 1

F2 - Acquisition Parameters  
Date\_ 20150102  
Time 2.49  
INSTRUM spect  
PROBHD 5 mm PABBO BB/  
PULPROG zgpg30  
TD 65536  
SOLVENT CDCl3  
NS 512  
DS 0  
SWH 24038.461 Hz  
FIDRES 0.366798 Hz  
AQ 1.3631488 sec  
RG 201.48  
DW 20.800 usec  
DE 6.50 usec  
TE 300.0 K  
D1 2.0000000 sec  
D11 0.0300000 sec  
TD0 1

==== CHANNEL f1 =====  
SF01 100.6304993 MHz  
NUC1 13C  
P1 9.00 usec  
PLW1 61.09999847 W

==== CHANNEL f2 =====  
SF02 400.1621006 MHz  
NUC2 1H  
CPDPRG2 waltz16  
PCPD2 90.00 usec  
PLW2 13.00000038 W  
PLW12 0.26705000 W  
PLW13 0.21630999 W

F2 - Processing parameters  
SI 32768  
SF 100.6294380 MHz  
WDW EM  
SSB 0  
LB 3.00 Hz  
GB 0  
PC 1.40

**Figure 14.**  $^{13}\text{C}$  spectrum of compound **3bg**

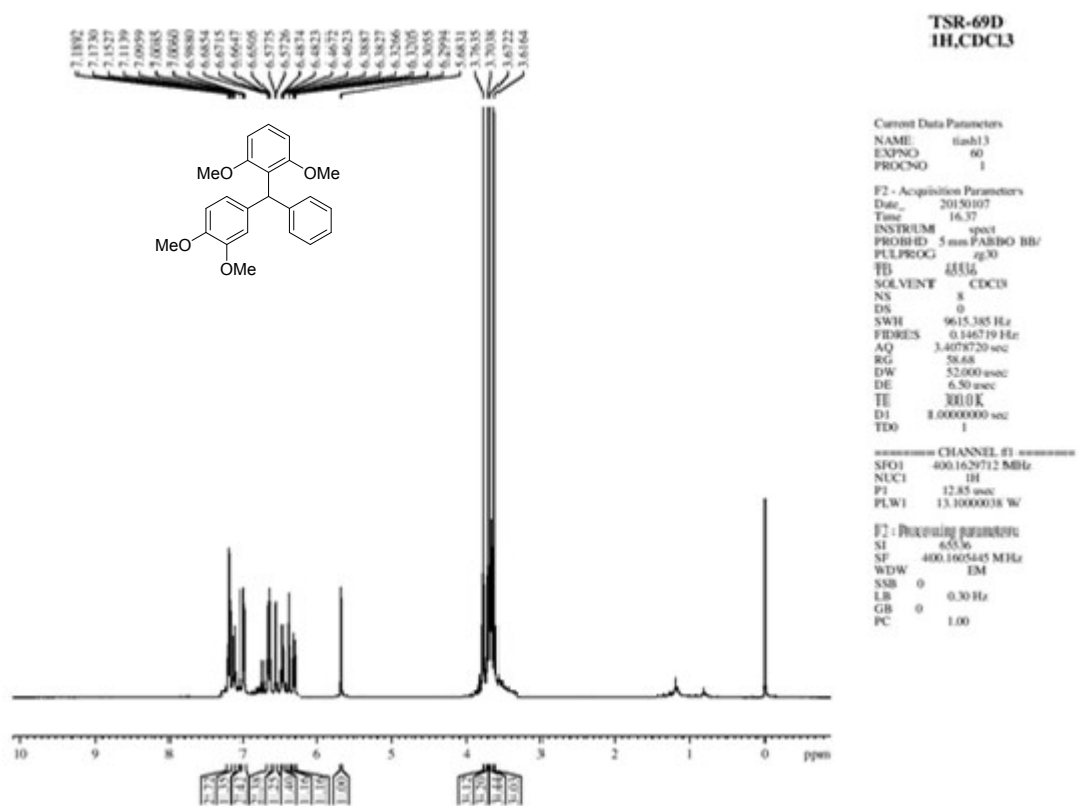

**Figure 15.**  $^1\text{H}$  spectrum of compound **3ah**

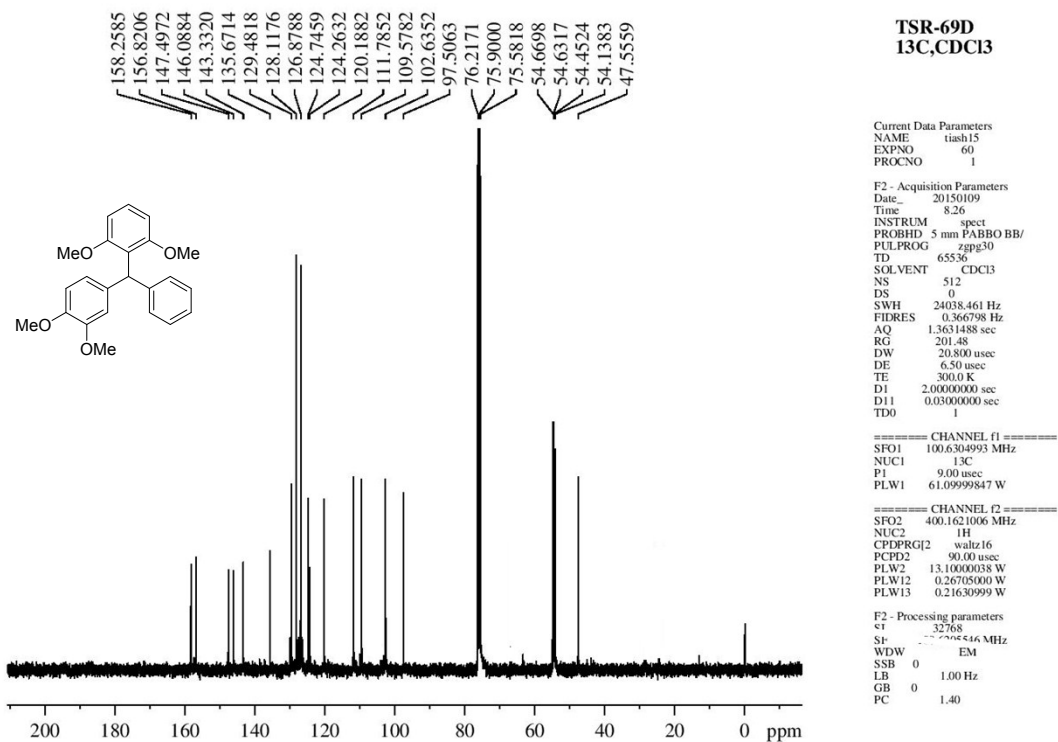

**Figure 16.**  $^{13}\text{C}$  spectrum of compound **3ah**

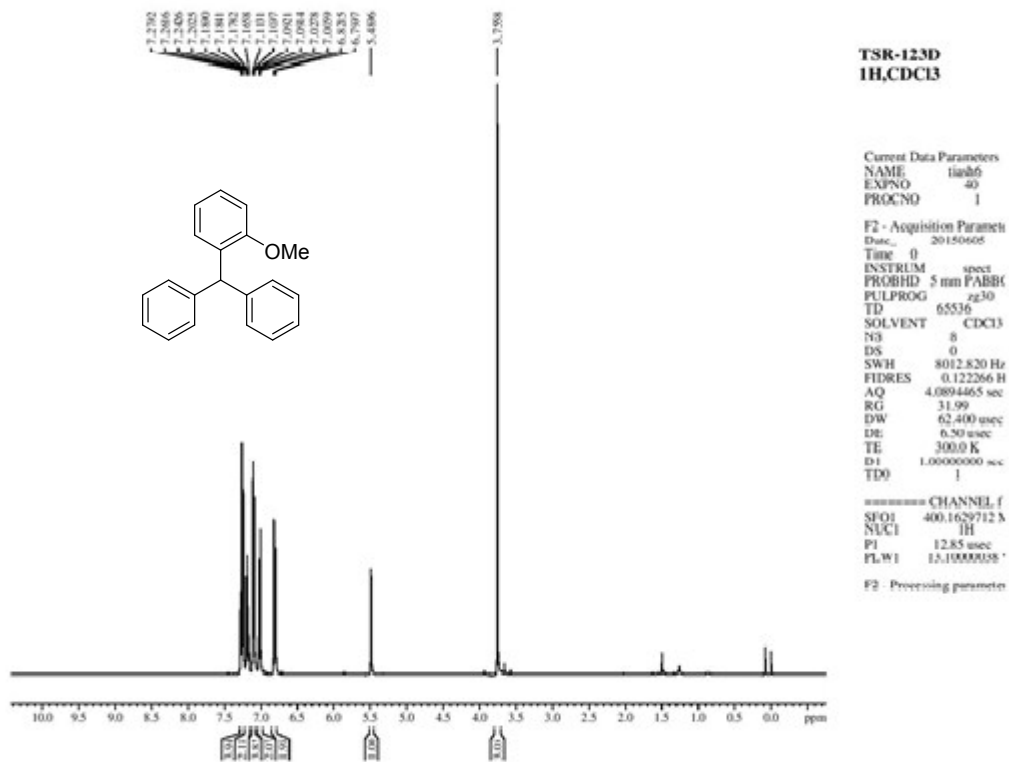

Figure 17. <sup>1</sup>H spectrum of compound 3ba



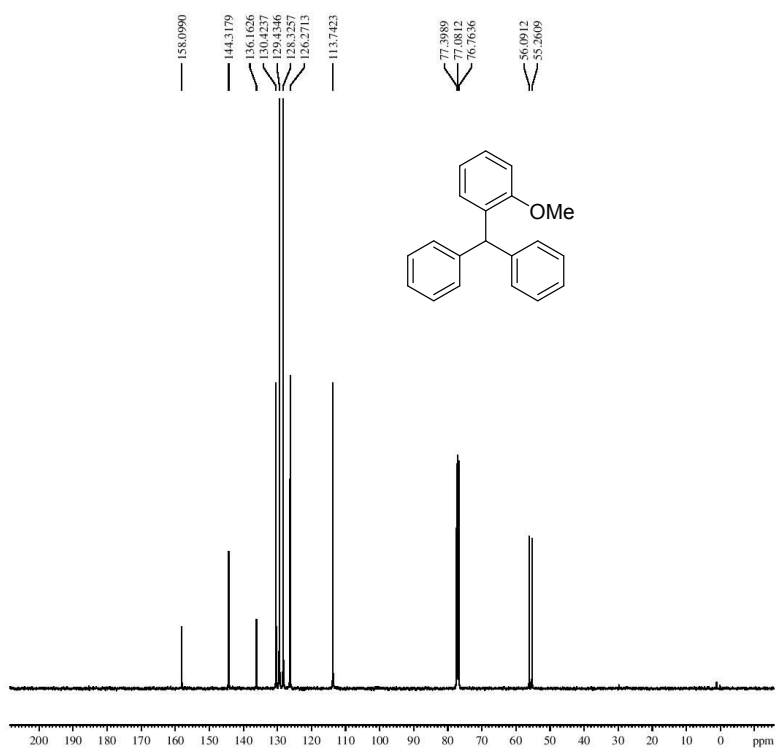

**TSR-123D,  
1H,CDCl3**

Current Data Parameters  
 NAME tiash6  
 EXPNO 50  
 PROCNO 1

F2 - Acquisition Paramete  
 Date\_ 20150608  
 Time 21.26  
 INSTRUM spect  
 PROBHD 5 mm PABBO  
 PULPROG zgpg30  
 TD 65536  
 SOLVENT CDCl3  
 NS 512  
 DS 0  
 SWH 24038.461 H  
 FIDRES 0.366798 H  
 AQ 1.3631488 sec  
 RG 201.48  
 DW 20.800 usec  
 DE 6.50 usec  
 TE 300.0 K  
 D1 2.0000000 sec  
 D11 0.03000000 sec  
 TD0 1

==== CHANNEL f  
 SFO1 100.6304993 M  
 NUC1 13C  
 P1 9.00 usec  
 PLW1 61.09999847 V

**Figure 18.** <sup>13</sup>C spectrum of compound 3ba

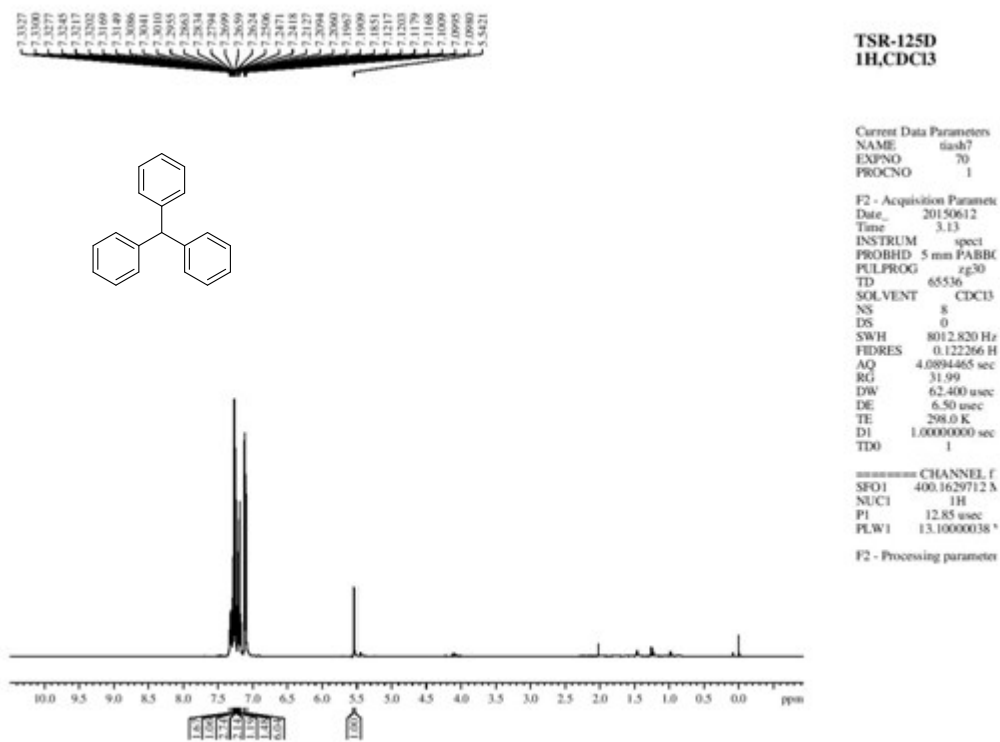

Figure 19. <sup>1</sup>H spectrum of compound 3ca

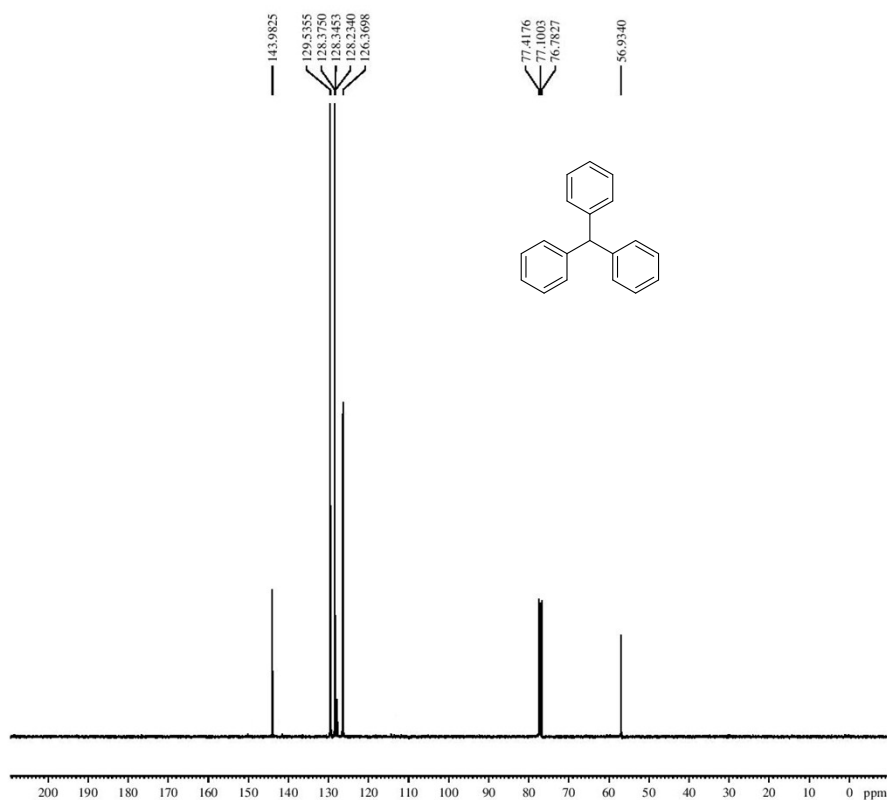

**TSR-125D**  
**1H,CDCI3**

Current Data Parameters  
NAME tiash6  
EXPNO 30  
PROCNO 1

F2 - Acquisition Parameters  
Date\_ 20150615  
Time 18.09  
INSTRUM spect  
PROBHD 5 mm PABBC  
PULPROG zgpg30  
TD 65536  
SOLVENT CDCl3  
NS 260  
DS 0  
SWH 24038.461 H  
FIDRES 0.366798 H  
AQ 1.3631488 sec  
RG 201.48  
DW 20.800 usec  
DE 6.50 usec  
TE 300.1 K  
D1 2.0000000 sec  
D11 0.0300000 sec  
TD0 1

==== CHANNEL f  
SFO1 100.6304993 M  
NUC1 13C  
P1 9.00 usec  
PLW1 61.09999847 V

**Figure 20.** <sup>13</sup>C spectrum of compound **3ca**

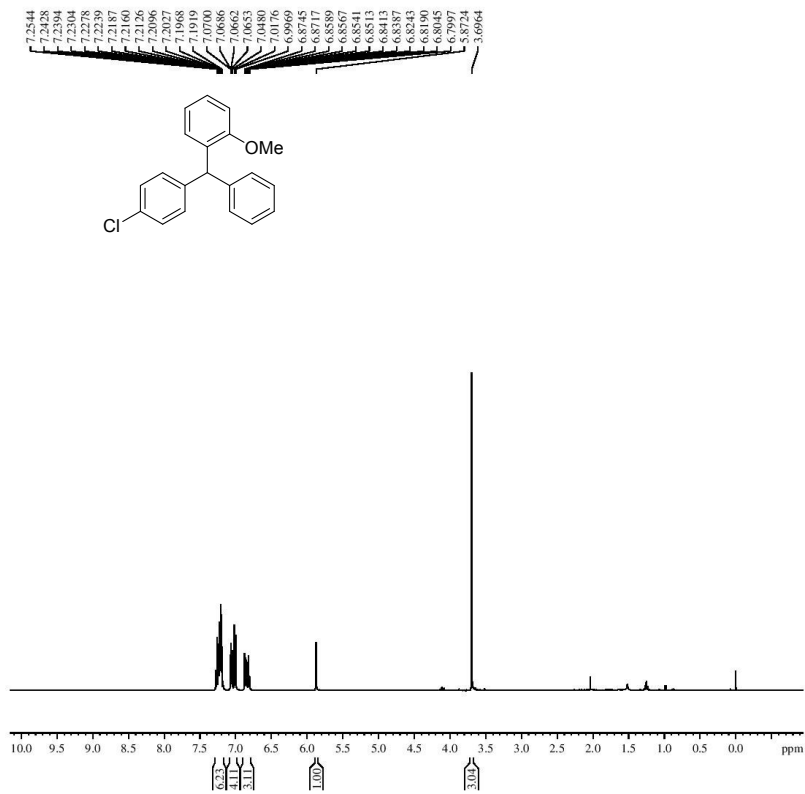

**TSR-128D**  
**1H,CDCl3**

Current Data Parameters  
NAME tiash6  
EXPNO 90  
PROCNO 1

F2 - Acquisition Parameters  
Date\_ 20150617  
Time 21.33  
INSTRUM spect  
PROBHD 5 mm PABBC  
PULPROG zg30  
TD 65536  
SOLVENT CDCl3  
NS 8  
DS 0  
SWH 8012.820 Hz  
FIDRES 0.122266 Hz  
AQ 4.0894465 sec  
RG 65.65  
DW 62.400 usec  
DE 6.50 usec  
TE 298.1 K  
D1 1.00000000 sec  
TDO 1

==== CHANNEL f  
SFO1 400.1629712 MHz  
NUC1 1H  
PI 12.85 usec  
PLW1 13.10000038 V

F2 - Processing parameter

**Figure 21.** <sup>1</sup>H spectrum of compound **3bi**

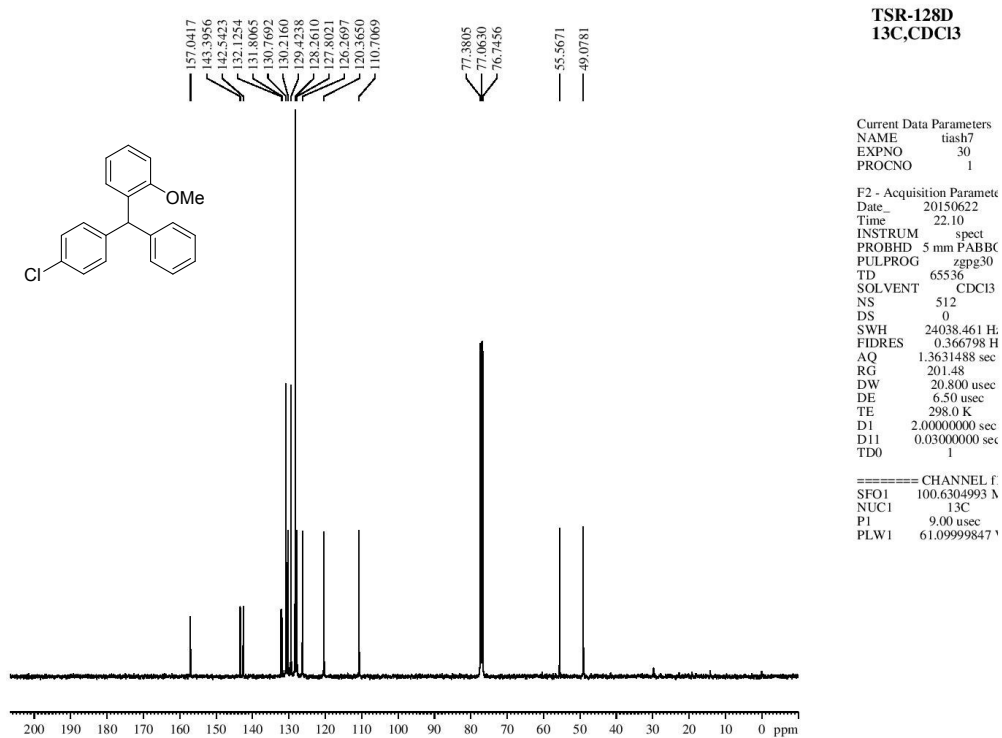

**Figure 22.**  $^{13}\text{C}$  spectrum of compound **3bi**

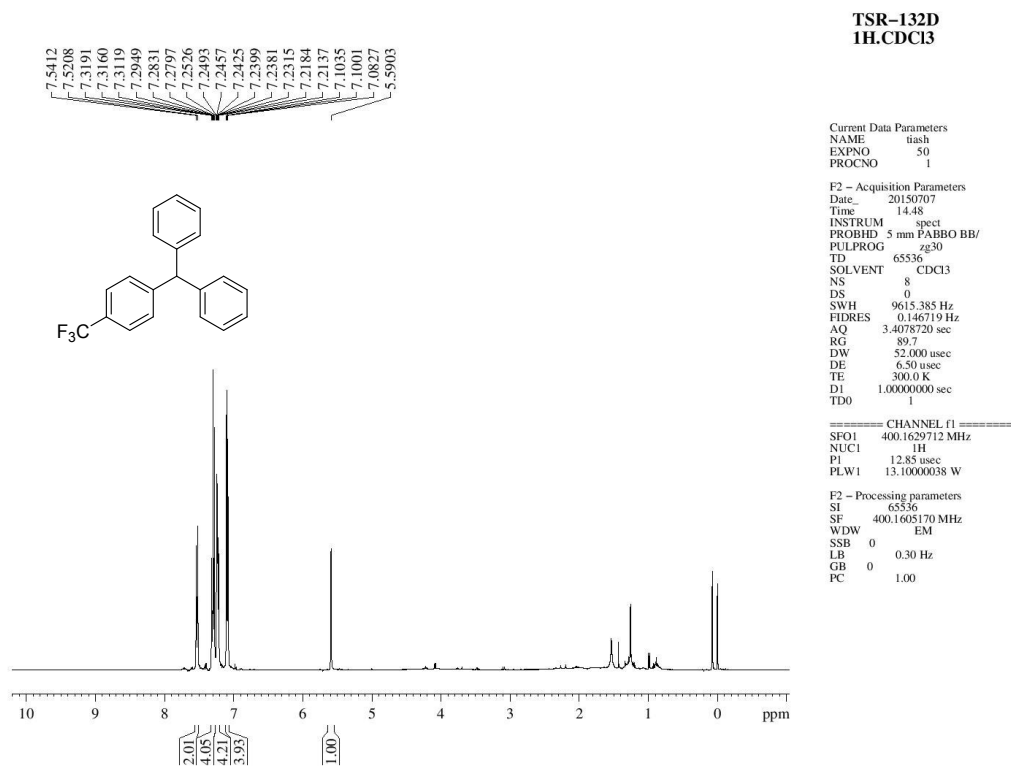

**Figure 23.**  $^1\text{H}$  spectrum of compound **3cj**

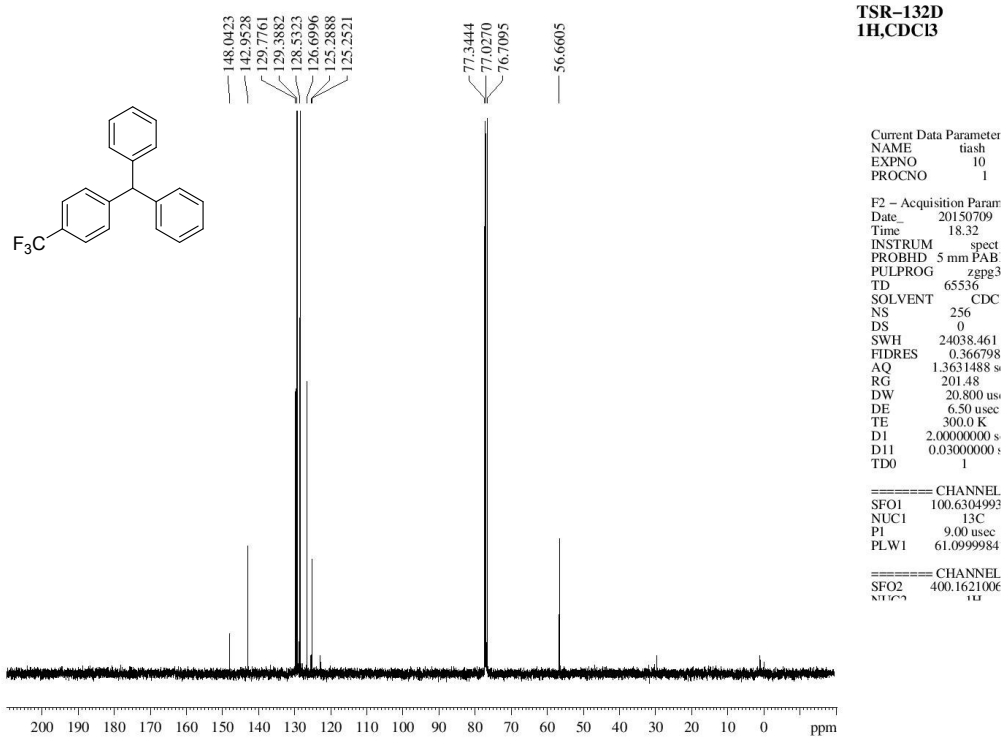

**Figure 24.**  $^{13}\text{C}$  spectrum of compound **3c**

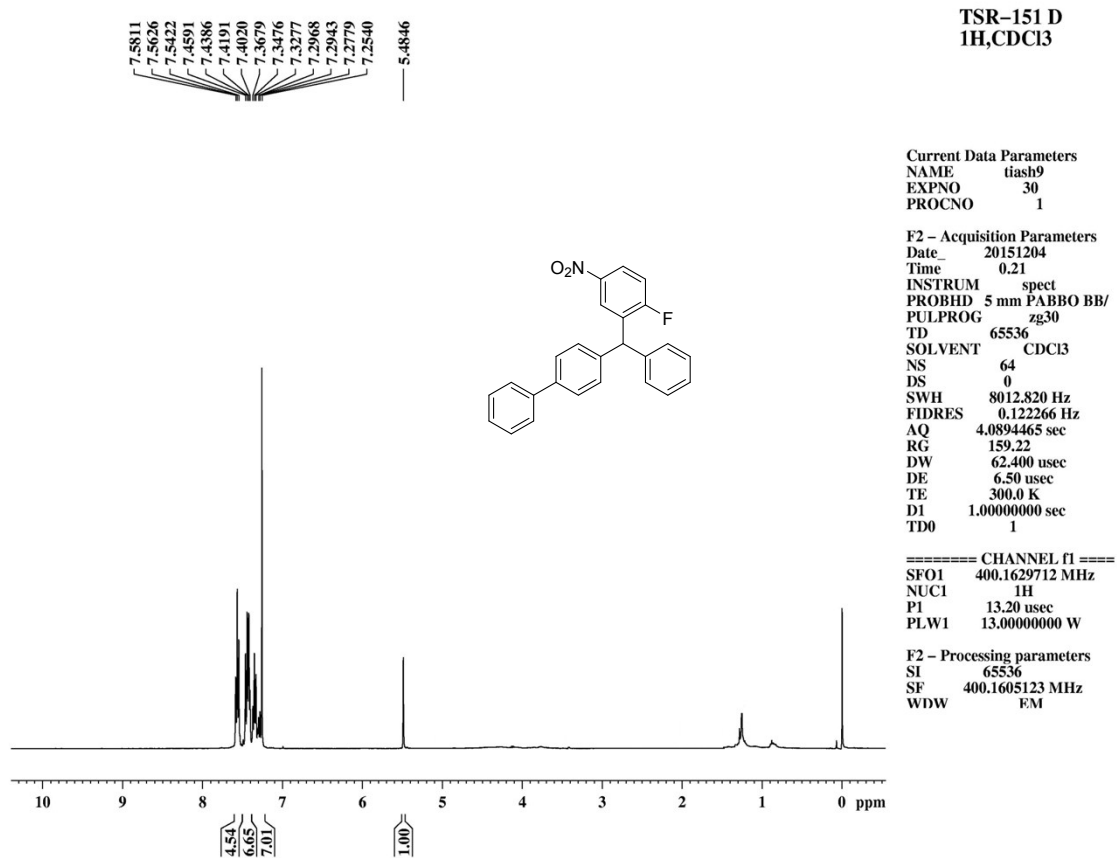

Figure 25. <sup>1</sup>H spectrum of compound 3dk



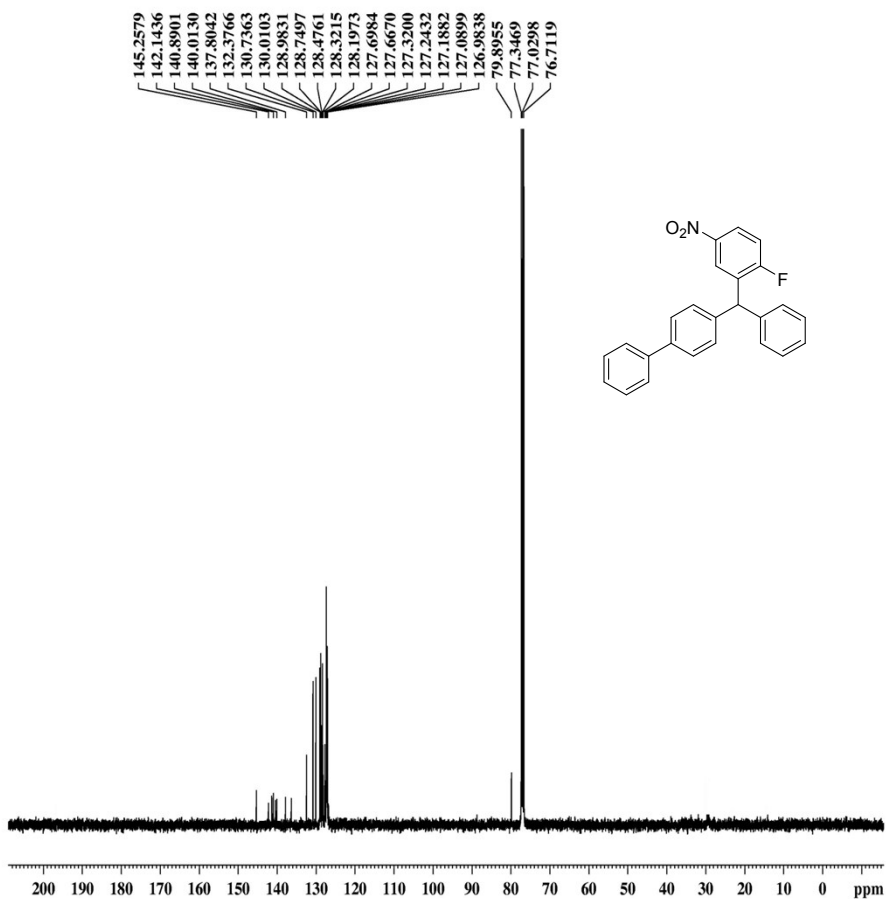

TSR-151-D  
13C,CDCl3

Current Data Parameters  
NAME tiash08  
EXPNO 20  
PROCNO 1

F2 - Acquisition Parameters  
Date\_ 20151201  
Time 11.09  
INSTRUM spect  
PROBHD 5 mm PABBO BB/  
PULPROG zgpg30  
TD 65536  
SOLVENT CDCl3  
NS 512  
DS 0  
SWH 24038.461 Hz  
FIDRES 0.366798 Hz  
AQ 1.3631488 sec  
RG 201.48  
DW 20.800 usec  
DE 6.50 usec  
TE 300.5 K  
D1 2.0000000 sec  
D11 0.03000000 sec  
TD0 1

==== CHANNEL f1 =====  
SFO1 100.6304993 MHz  
NUC1 13C  
P1 9.90 usec  
PLW1 53.0000000 W

==== CHANNEL f2 =====  
SFO2 400.1621006 MHz  
NUC2 1H

Figure 26. <sup>13</sup>C spectrum of compound 3dk

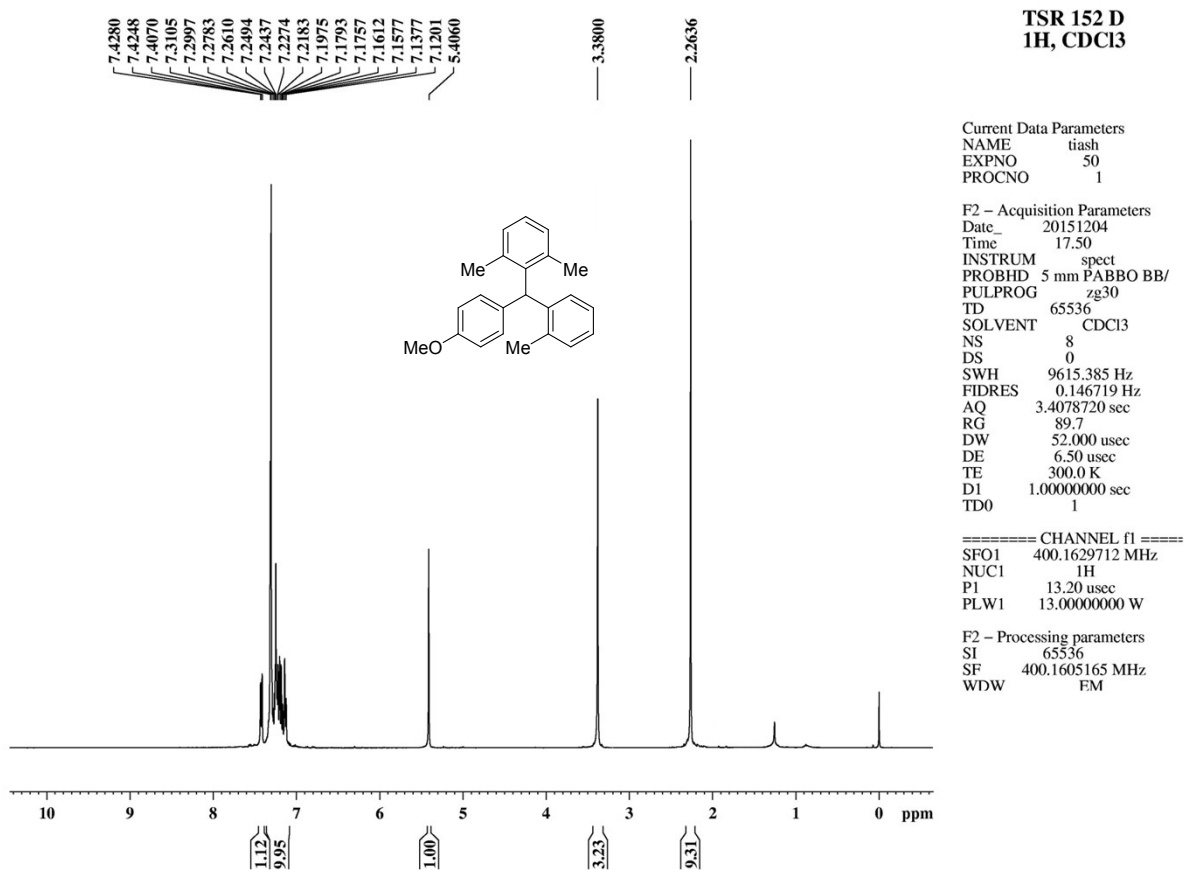

**Figure 27.** <sup>1</sup>H spectrum of compound **3ef**

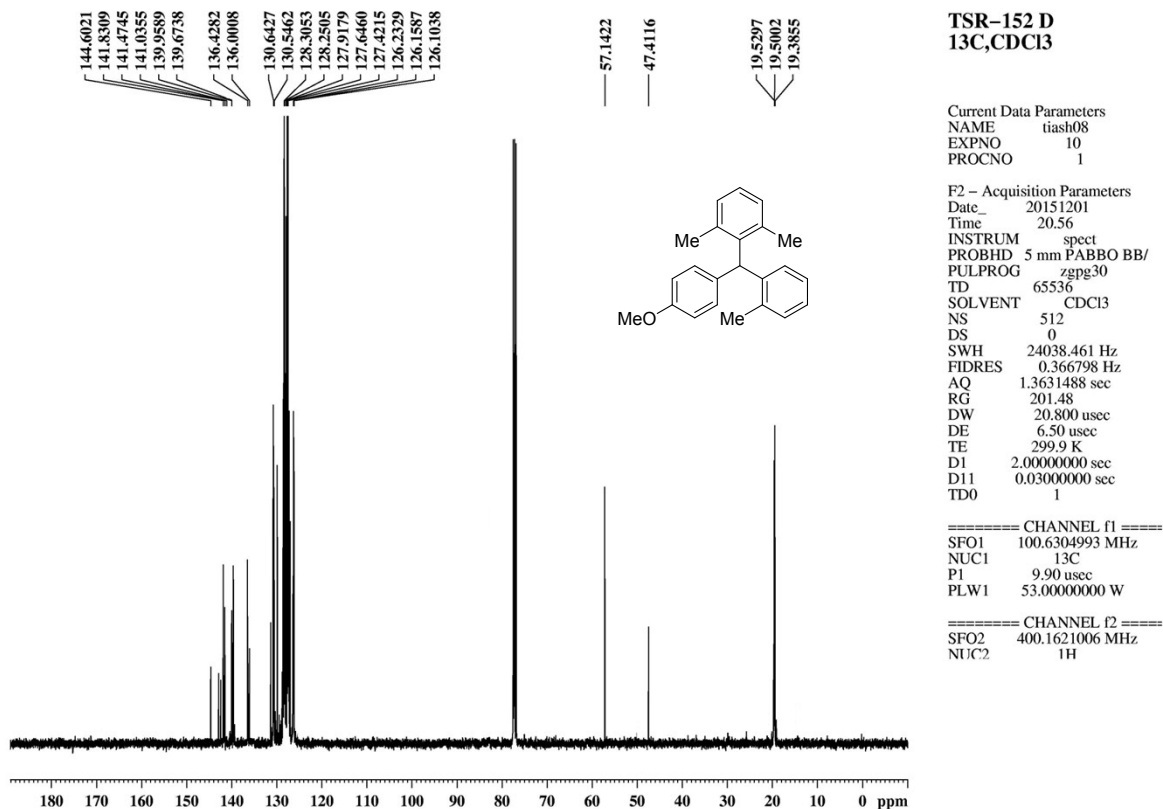

Figure 28. <sup>13</sup>C spectrum of compound 3ef

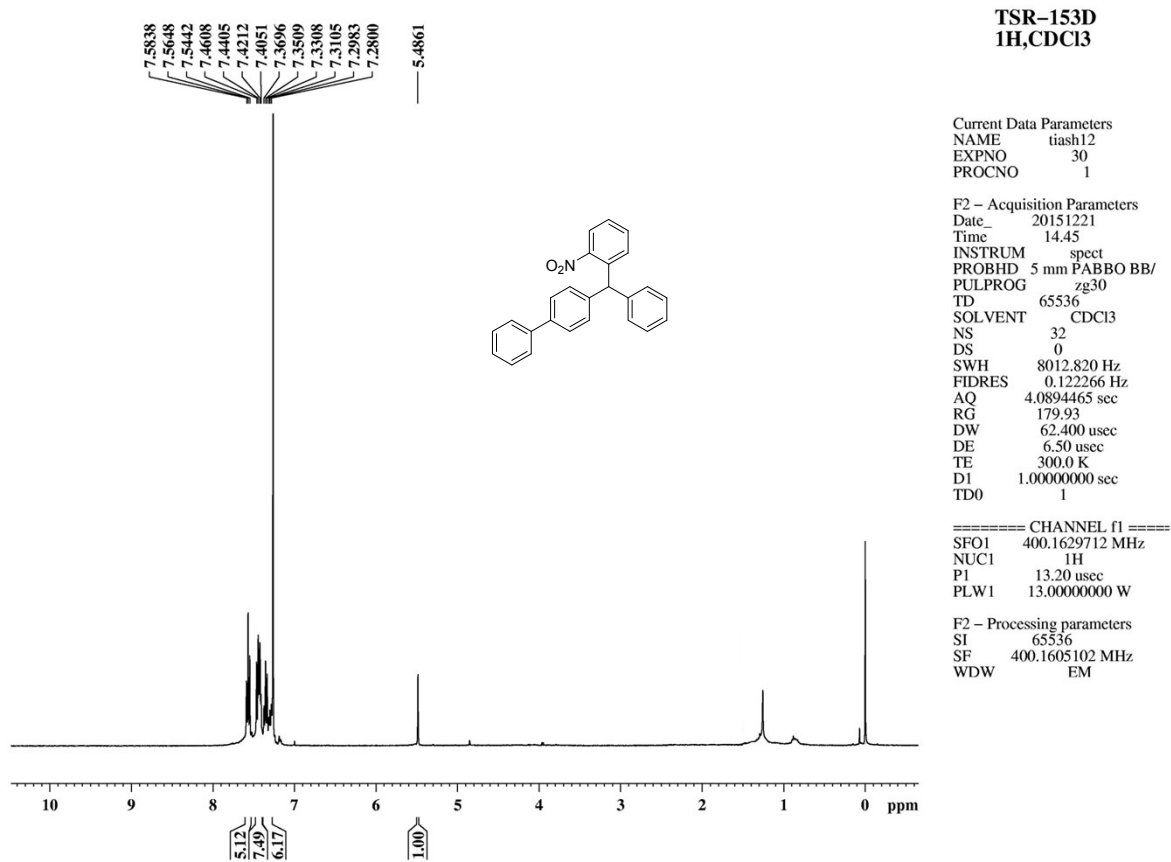

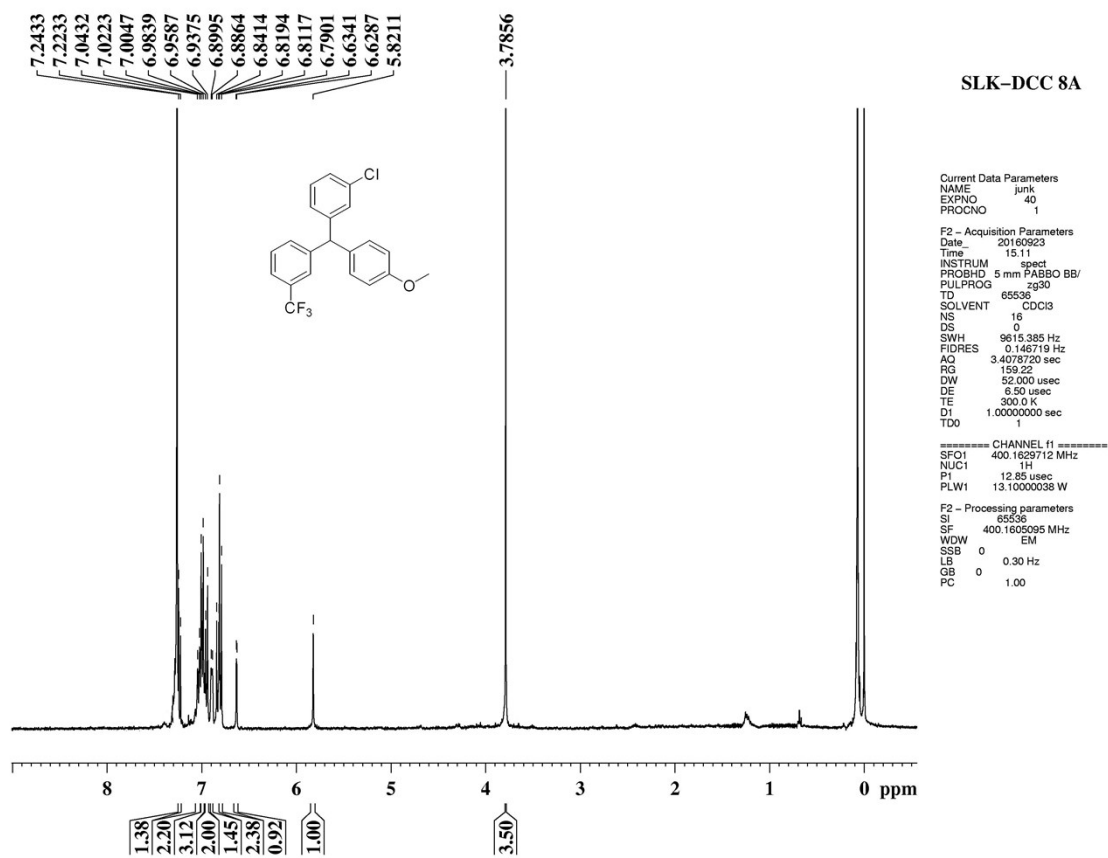

Figure 30.  $^1\text{H}$  spectrum of compound 3hl

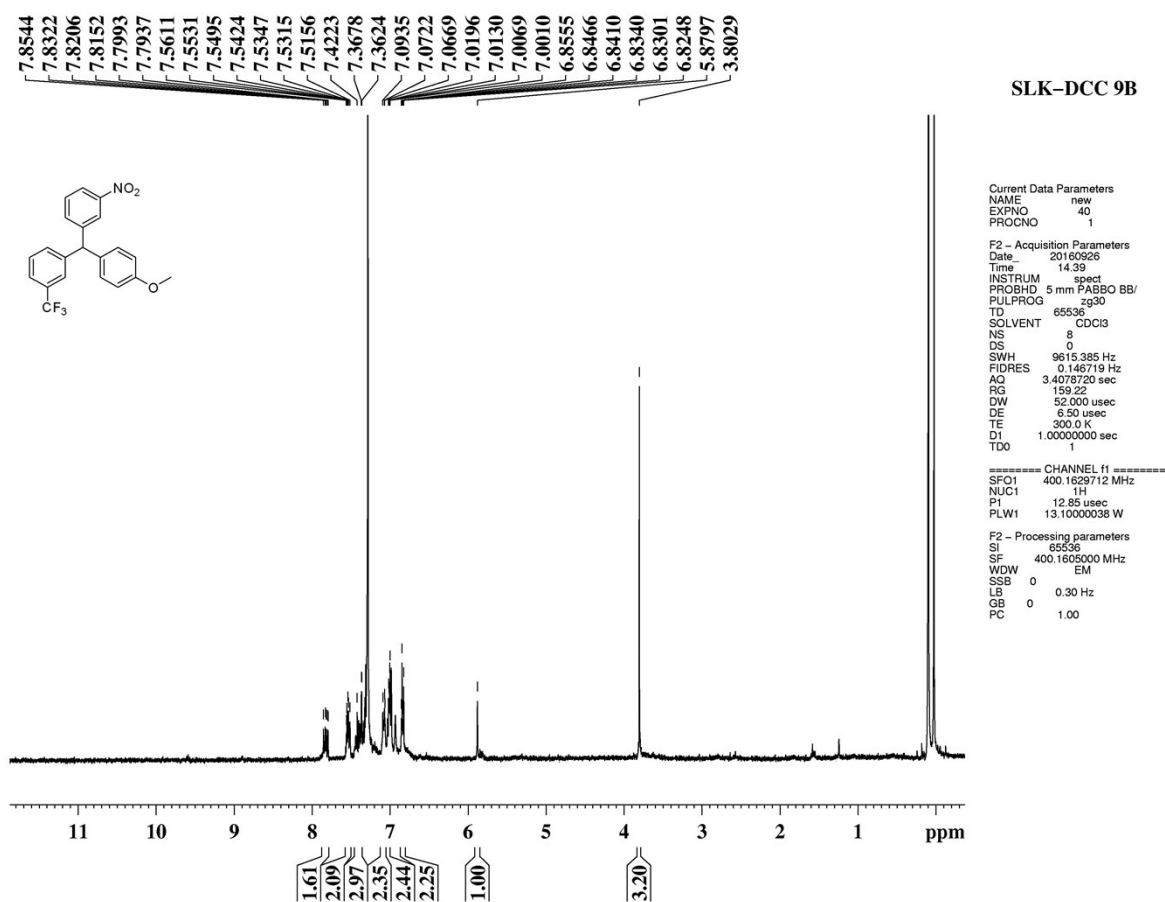

Figure 31. <sup>1</sup>H spectrum of compound 3gl

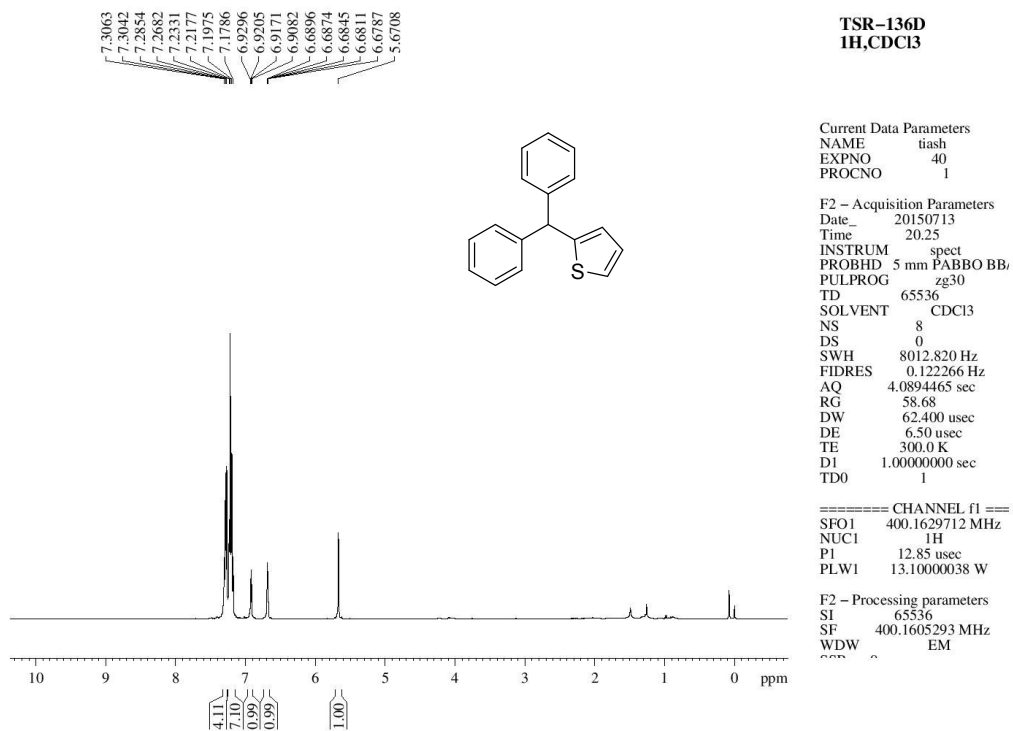

**Figure 32.**  $^1\text{H}$  spectrum of compound **5**

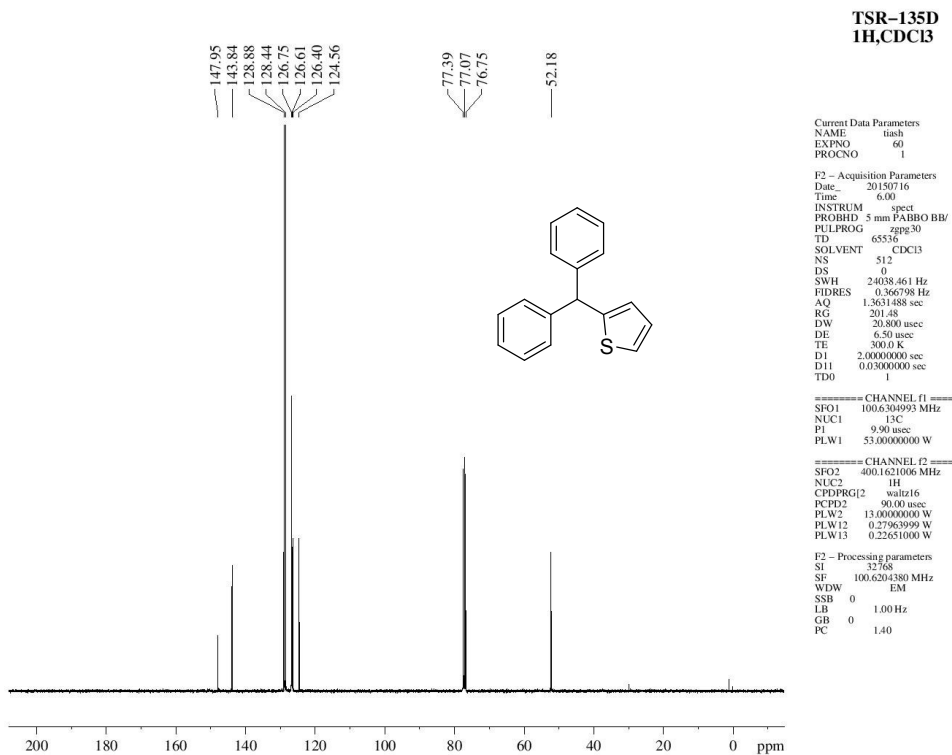

**Figure 33.**  $^{13}\text{C}$  spectrum of compound 5
